1

2

3 Response time modelling reveals evidence for multiple, distinct sources of moral decision

4 caution

5

6

7 Milan Andrejević<sup>1</sup>, Joshua P. White<sup>1</sup>, Daniel Feuerriegel<sup>1</sup>, Simon Laham<sup>1</sup>, Stefan Bode<sup>1</sup>

8 1. Melbourne School of Psychological Sciences, The University of Melbourne, Parkville,

9 Victoria 3010, Australia

10

11

12

13

14

15 **Corresponding Author:** Milan Andrejević

16 [milan.andrejevic@unimelb.edu.au](mailto:milan.andrejevic@unimelb.edu.au)

17 Postal Address: Milan Andrejević, Melbourne School of Psychological Sciences, Redmond

18 Barry Building, The University of Melbourne, Parkville, Victoria 3010, Australia

19

## Abstract

20           People are often cautious in delivering moral judgments of others' behaviours, as  
21 falsely accusing others of wrongdoing can be costly for social relationships. Caution might  
22 further be present when making judgements in information-dynamic environments, as  
23 contextual updates can change our minds. This study investigated the processes with which  
24 moral valence and context expectancy drive caution in moral judgements. Across two  
25 experiments, participants ( $N = 122$ ) made moral judgements of others' sharing actions. Prior  
26 to judging, participants were informed whether contextual information regarding the  
27 deservingness of the recipient would follow. We found that participants slowed their moral  
28 judgements when judging negatively valenced actions and when expecting contextual  
29 updates. Using a diffusion decision model framework, these changes were explained by shifts  
30 in drift rate and decision bias (valence) and boundary setting (context), respectively. These  
31 findings demonstrate how moral decision caution can be decomposed into distinct aspects of  
32 the unfolding decision process.

33           **Keywords:** moral decision caution, moral judgment, response time, drift diffusion  
34 model, dictator game, context update

35

## Introduction

36

37

38

39

40

41

42

43

44

45

46

Moral judgements are an integral and pervasive part of being human - they undergird our social relationships and form the basis for our legal, political, and governmental institutions<sup>1</sup>. Yet moral judgements are not made in isolation but in a complex informational context; various types of contextual information can influence our moral judgements. For example, moral judgements can be modulated by contextual information regarding the social identities of moral actors and victims<sup>2,3</sup>, their economic class<sup>4</sup>, their relational status<sup>5,6</sup>, the actor's mitigating circumstances<sup>7</sup>, as well as the victim's history of moral or immoral actions (i.e. their moral deservingness)<sup>8,9</sup>. Such information can also lead people to change their minds about their moral judgements. Recent research has shown that people flexibly update their judgements upon receiving contextual information, switching from relying on context-independent to context-dependent norms<sup>9</sup>.

47

48

49

50

51

52

53

54

55

56

57

58

59

In distributive justice scenarios, context-dependent norms are often preferred over context-independent norms. For example, if information regarding individual contributions of actors to shared resources or the history of previous transactions is made available, people prefer splitting resources in accordance with norms that account for such information (e.g., equity norm<sup>10-12</sup>, reciprocity norm<sup>13,14</sup>, indirect reciprocity norm<sup>15,16</sup>), rather than ignoring this information and allocating equal amounts to each individual (equality norm<sup>17-19</sup>). Some individuals prefer context-dependent norms so much that they refrain from making strong judgements prior to the presentation of contextual information<sup>9</sup>. This may reflect the caution of these individuals not to make judgements that may later, upon learning additional information, turn out to be mistaken as they no longer align with preferred context-dependent norms. Thus, caution against selecting a judgment which that is not in line with personal moral norms (i.e. moral decision caution) likely plays an important role in dynamic everyday moral decision-making situations, especially when we are aware that we may learn

60 additional, decision-relevant information in the near future. However, the moral decision  
61 process in such situations is poorly understood, partly because there is no adequate process  
62 model that would allow investigating various forms of moral decision caution more directly.

63 Caution has been studied in different areas of decision research, mostly using single-  
64 decision tasks involving perceptual and reward-based choices. One form of caution  
65 characterized by this research is a tendency for an individual to slow their response time (RT)  
66 in order to increase the likelihood of making a correct choice<sup>20</sup>. Generally, participants show  
67 this tendency when under explicit instructions to ensure high accuracy<sup>21</sup>, when there are high  
68 monetary costs for mistakes<sup>22</sup>, and in conditions of high task difficulty, so as to maximize  
69 reward rate<sup>23</sup>. This form of caution enables people to adapt their decision processes to suit  
70 changing environmental demands.

71 This form of caution may also be a useful way for people to adapt their moral  
72 decision-making when there is an expectancy of learning more information at the time of the  
73 decision. Recent research suggests that people display this form of caution as they learn about  
74 the likelihood of outcomes or consequences of their choices. People slow their judgements to  
75 reduce the likelihood of errors when they are aware that they are likely to make an error in  
76 the given task<sup>24</sup>, as well as when they are aware that the association between their choices  
77 and the outcomes resulting from these choices is volatile<sup>25</sup>. Expectancy of learning contextual  
78 information in moral judgements also changes the subjective likelihood of judgement errors,  
79 defined as choices that appear correct based on the information available at the time of the  
80 decision (in line with context-independent norms) but turn out to be incorrect as contextual  
81 information is learned (not in line with the preferred context-dependent norms). Therefore,  
82 expectancy of learning contextual information may also lead to this form of caution and slow  
83 down moral judgements.

84           However, there is also another form of caution, which is highly relevant for moral  
85 judgements: People may particularly slow their RTs when judging someone's action as  
86 morally bad, to increase the likelihood of being correct (according to their personal moral  
87 norms) when selecting this option. This tendency can be conceptualised as a *decision bias*,  
88 which has been shown to occur in other contexts against choice options associated with  
89 smaller rewards<sup>21</sup>, or larger punishments<sup>26</sup>. Morally blaming others is socially risky as it may  
90 lead to reprisals if that blame is improperly placed. Indeed, people are more motivated to stay  
91 as accurate as possible by ensuring their judgements are up to date with all the available  
92 information when making negative judgements<sup>27,28</sup>. However, there is an alternative  
93 explanation for why people may take longer when judging someone as bad that is unrelated  
94 to caution. Namely, people tend to take longer to evaluate negative information, even when  
95 they are not required to make any decisions, and there are no response options to be cautious  
96 about. For instance, people report thinking more thoroughly about negative events<sup>29</sup>, they  
97 look longer at negative content when scrolling through images<sup>30</sup>, and are longer distracted by  
98 morally negative words<sup>31</sup>. Such effects suggest that people take longer to process negatively  
99 valenced information<sup>32</sup>. Therefore, there are two distinct explanations for slower RTs when  
100 making negative moral judgements: a decision bias (defined as a tendency to be more  
101 cautious when judging someone as bad), and a slower rate of evaluation of negative  
102 information (i.e. evidence for the negative judgement). For this reason, previous research  
103 relying on simple comparisons of mean RTs has been unable to disentangle the cognitive  
104 processes underlying the slowing<sup>32</sup>. This is again due to the fact the there is no process model  
105 specifically developed for moral decision-making that would allow us to investigate this  
106 question.

107           In other fields of decision science, evidence accumulation models have been widely  
108 applied to disentangle parts of the decision process. These process models include

109 mathematically formalized parameters that correspond to evidence accumulation (i.e. the rate  
110 at which evidence is evaluated) and the two forms of caution described above, and might  
111 therefore be useful for partitioning distinct sources of moral decision caution. One prominent  
112 model of this class is the Diffusion Decision Model (DDM)<sup>33–35</sup> which has been used to study  
113 decision-making across a broad range of discrete choice tasks<sup>33,36–39</sup>. The DDM describes the  
114 decision process as a continuous accumulation of noisy evidence for different choice  
115 outcomes. Once evidence in favour of a particular choice reaches a boundary, a decision is  
116 made. These models find substantial support from animal studies where neural firing rates in  
117 middle temporal and ventral intraparietal areas found to closely track the trajectory of  
118 evidence accumulation<sup>40,41</sup>. Although predominantly used to model perceptual decision-  
119 making processes, where sensory evidence is accumulated by the sensory systems, the DDM  
120 can be regarded as a universal decision process model, and it has been used to model value-  
121 based decisions<sup>42</sup>, sharing and cooperation choices<sup>43–45</sup> as well as moral decisions<sup>46</sup>. For such  
122 higher-level decisions, the accumulation process represents integration of signals from brain  
123 areas that calculate subjective value<sup>47</sup>, integrate representations of potential gains and  
124 losses<sup>48</sup>, and perform diverse social and moral computations that have not yet been well  
125 specified by previous research<sup>44,46</sup>.

126         The rate of evidence processing (i.e. the evidence strength), and two forms of caution,  
127 correspond to specific parameters of the DDM model. In the DDM model, caution against  
128 making an error across response options is formalized as the amount of evidence needed to  
129 make a choice and is estimated by *the boundary separation (a)* parameter. Given the role of  
130 this parameter in adapting decision processes to environmental demands<sup>21,24,25</sup> (as described  
131 above), this parameter may increase - corresponding to a wider boundary separation, when  
132 expecting contextual information. Biases against one of the response options are formalized  
133 as shifts in the starting point of the accumulation process, thus capturing how much people

134 favour a certain response option prior to observing the stimulus, and is estimated by *the*  
135 *(starting point) bias parameter* ( $z$ ). This parameter has been shown to shift towards the  
136 response option associated with a reward<sup>21</sup> and away from response options associated with  
137 punishment<sup>26</sup>. In the case of moral judgements, because of the potential social repercussions  
138 that come with placing moral blame improperly, the bias parameter may be shifted towards  
139 the “good” judgement choice. And third, the average rate of evidence accumulation,  
140 capturing the strength of evidence favouring either response option in a task, is estimated by  
141 *the drift rate* ( $v$ ) parameter. In visual discrimination tasks, this parameter has been shown to  
142 scale with stimulus discriminability<sup>21</sup>. We expected this parameter to scale with the  
143 prototypicality of action as morally good (representing adherence to a moral norm) or bad  
144 (representing deviation from a moral norm). Moreover, if negative evidence is accumulated  
145 slower than positive evidence (independent from potential biased caution against “bad”  
146 judgements accounted by the  $z$  parameter), we expect negative evidence to decrease the drift  
147 rate parameter.

148         In the current study we used a modified version of a recently developed moral  
149 judgement task<sup>9,49</sup> to test the effects of context-expectancy and moral valence on RT and  
150 parameters of the decision process, as operationalised by the DDM. We asked participants to  
151 observe a variant of the dictator game in which a “Decision-maker” decided to share a  
152 proportion of \$10 with another person (the “Receiver”; Figure 1a). Participants were aware  
153 that these choices were made in a particular informational context. Participants knew either  
154 that decision-makers knew nothing about the Receiver, or that they knew how ‘deserving’ the  
155 Receiver was, based on their past sharing behaviour towards another person. In each trial  
156 participants made moral judgements about the Decision-maker’s sharing action while  
157 expecting a contextual update about the Receiver’s deservingness (*context-expectant*  
158 condition) or while not expecting an update (*no-context* condition; Figure 1b). In Experiment

159 1 these two conditions were presented interleaved. Experiment 2 was used to replicate the  
160 results using a near-identical paradigm with an independent sample of participants. In the  
161 second experiment the two conditions were presented in separate blocks, which further  
162 controlled for the possibility that the interleaved presentation of conditions might have had an  
163 impact on participants' decision strategies. Naturally, there are individual differences in the  
164 norms people rely on to make such judgements. A majority of people, however, condemn low  
165 and endorse high offers<sup>9</sup>. To avoid possible confounding of response times due to potential  
166 differences in the reliance on different sets of norms across individuals, and to ensure that the  
167 perception of our stimuli as “evidence” for judgement options was roughly consistent across  
168 the sample (a necessary assumption of the DDM when fit for a group of individuals in a  
169 hierarchical model, see Methods), we limited our investigation in both experiments to this  
170 largest subset of participants, who endorsed generosity and condemned selfishness<sup>9</sup>  
171 (implications for limitations will be addressed below).

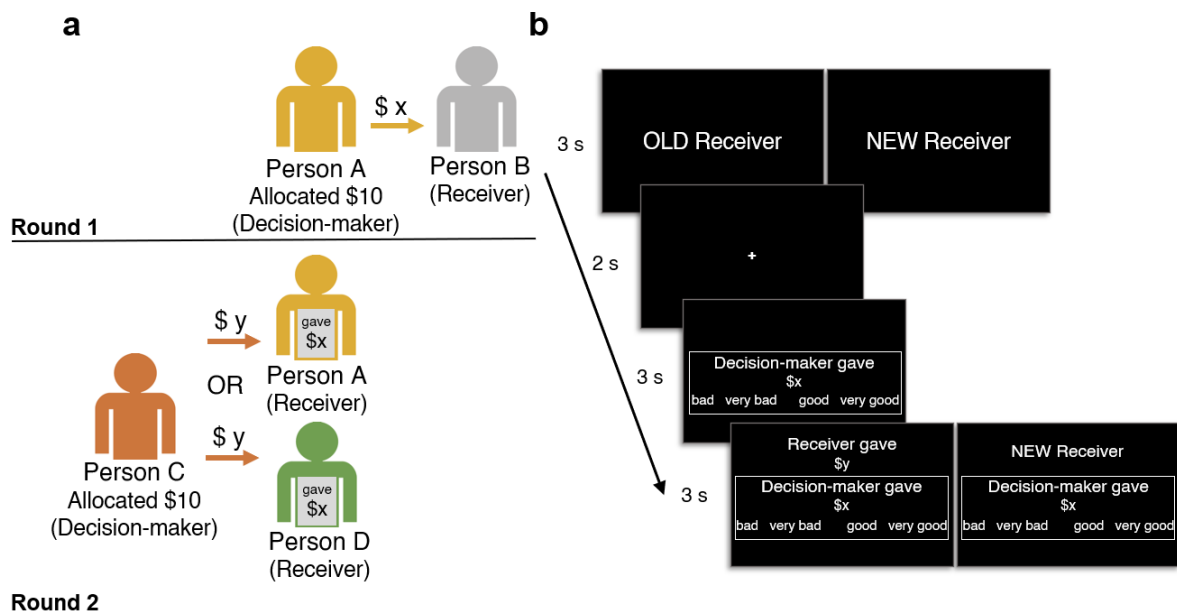

172  
173

174 **Figure 1. Moral judgement context-expectancy paradigm.** (a) Depiction of the cover  
175 story participants read prior to the experiment about a recently conducted study. The cover-



176 story study was fictitious, but our participants were not informed of this. It involved persons  
177 interacting across two rounds: In Round 1, Person A played the role of the Decision-maker  
178 and had to decide how to share \$10 with their partner, Person B. In Round 2, a new person  
179 (Person C) became a Decision-maker and was paired with either Person A or a new person  
180 (Person D), and had to decide how to share \$10 with their partner. Importantly, Person C  
181 knew whether their partner took part in Round 1, and if they did (e.g., Person A), how much  
182 they gave when they were the Decision-maker ( $\$x$ ). Person C decided to give a certain  
183 amount ( $\$y$ ) to their partner (either person A or person D, depending on the trial). (b) Trial  
184 sequence. Participants were presented with information regarding the context-expectancy  
185 condition of the current trial. “OLD Receiver” indicated that they would judge the Round 2  
186 Decision-maker who was paired with a Receiver (i.e. Person A) who gave an amount  $\$x$  to  
187 another person in the previous round. Our participants made this judgement without yet  
188 knowing this  $\$x$  amount, but knowing that they would soon learn this information (i.e. the  
189 context-expectancy condition); or “NEW Receiver”, indicating that they would judge the  
190 Round 2 Decision-maker paired with a new person (i.e. Person D), and that there was no  
191 additional contextual information to expect (no-context condition). Next, participants were  
192 presented with the amount that the Round 2 Decision-maker gave to their partner and selected  
193 their judgement (one of the four options) on a keyboard. After this, in context-expectant  
194 condition, the amount that the Receiver had given in the previous round ( $\$x$ ) was revealed. In  
195 the no-context condition, no additional information was presented. Participants again  
196 indicated their judgement of the Decision-maker’s action on their keyboard.

## 197 **Results**

198 The selected sample of participants relied on similar norms when performing their  
199 judgements (judging low offers as bad and high offers as good) as expected, and there were

200 no systemic differences in the proportions of moral choice for each choice option across  
201 expectancy conditions (depicted in Figure 2).

202 We took two approaches to test for effects of context-expectancy and moral valence  
203 on response speed in moral judgements. The first approach was to test for these effects by  
204 comparing RTs without formally specifying the decision process. Our predictions for these  
205 RT comparisons together with the analysis approach were preregistered  
206 (<https://aspredicted.org/blind.php?x=dy3qk9>). The second approach was to use the DDM to  
207 better characterise these effects by comparing model parameter estimates across expectancy  
208 and valence conditions.

209 With regards to our first approach we tested three hypotheses. First, we investigated  
210 whether expectancy of contextual information increases caution, by testing whether the RTs  
211 of initial judgements were higher in the context-expectant than in the no-context condition.  
212 Second, we investigated whether morally negative evidence is evaluated more cautiously and  
213 is processed at a slower rate. This hypothesis was operationalised as the assumption that the  
214 effect of morally negative valence linearly decreases with the size of the Decision-maker's  
215 offer. We therefore expected a negative relationship between the Decision-maker's offer and  
216 RT. Third, to investigate whether caution when expecting a contextual update is particularly  
217 pronounced for negative judgements, we tested whether the slope of the negative relationship  
218 between RT and Decision-maker's offer was steeper in the context-expectant condition. To  
219 test these hypotheses, we formulated several Generalised Linear Mixed-effects Models,  
220 which included the Decision-maker's offer, the expectancy condition, and their interaction, as  
221 predictors of RT (Supplement 1 Table S2).

222 The best-fitting model included main effects of Decision-maker's offer and  
223 expectancy condition but did not include an interaction, and the intercepts and the slopes of  
224 these two main effects were allowed to vary across individuals (Supplement 1 Table S2). The

225 two main effects were substantial and statistically significant. Context-expectancy led to a 23  
226 ms slowing of RTs, 95% CI [5, 41] in Experiment 1. One possibility is that this effect may  
227 have been reduced due to the interleaved design, which could have led to an overflow of  
228 decision criteria among trials of different conditions. This was addressed with Experiment 2,  
229 which used a blocked design and replicated the context-expectancy effect, which was indeed  
230 much larger. Context-expectancy led to a 138 ms slowing, 95% CI [110, 165]. These results  
231 support the hypothesis that context-expectancy increases caution. Regarding the second  
232 hypothesis, we found that a single dollar reduction in the Decision-maker's offer predicted a  
233 26 ms slowing of RTs, 95% CI [31, 21] in Experiment 1. This effect again replicated in  
234 Experiment 2 showing 28 ms slowing for each dollar reduction in the Decision-maker's offer,  
235 95% CI [31, 24]. These results support the hypothesis that that negatively valenced evidence  
236 is evaluated more cautiously or takes longer to process. The two main effects were consistent  
237 across quantiles (RT quantiles by condition are displayed in Figure 3). They were also robust  
238 across different models (Supplement 1 Table S2) and across alternative approaches to  
239 modelling RT distributions (Supplement 1 Table S4 and S5). As for the interaction effect,  
240 there was no evidence across these two studies supporting the hypothesis that effects of  
241 negative valence are more pronounced when people are expecting a contextual update.  
242 Models including the interaction effect had poorer fits, and confidence intervals for this  
243 interaction parameter consistently included zero.

244

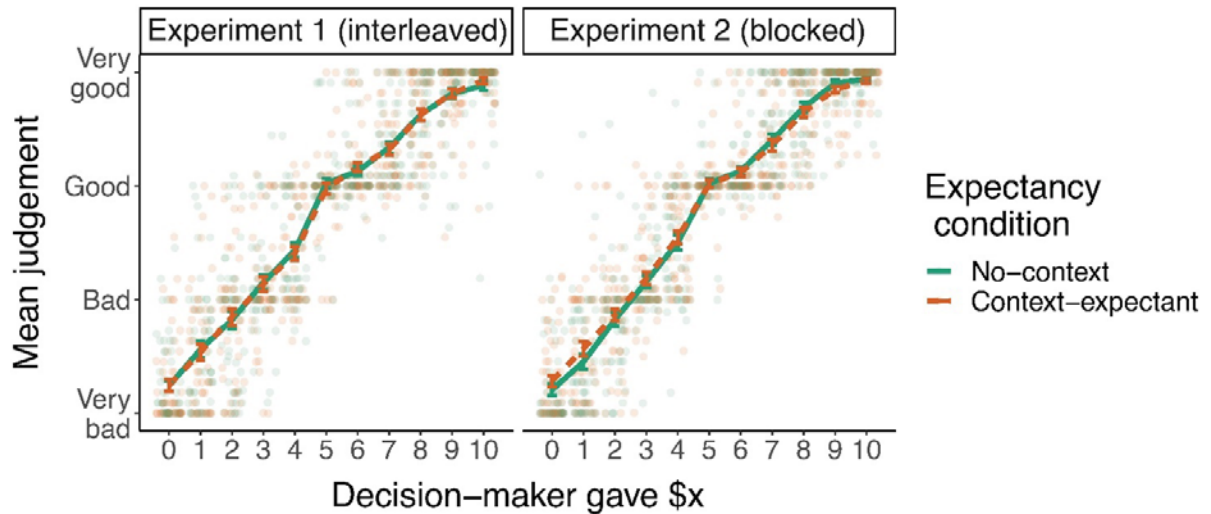

245

246 **Figure 2. Moral judgement results.** Scattered dots indicate mean judgements of Decision-

247 maker's offer for each participant; lines indicate the mean across participants for context-

248 expectancy (orange) and no-context (green) conditions. Error bars depict the SEM. The

249 monotonic increase in moral endorsement across Decision-maker's offers indicates that

250 participants condemned low and endorsed high offers. The complete overlap of two the lines

251 representing the conditions indicates that there were no detectable systemic differences in

252 moral judgement across expectancy conditions in the two experiments.

253

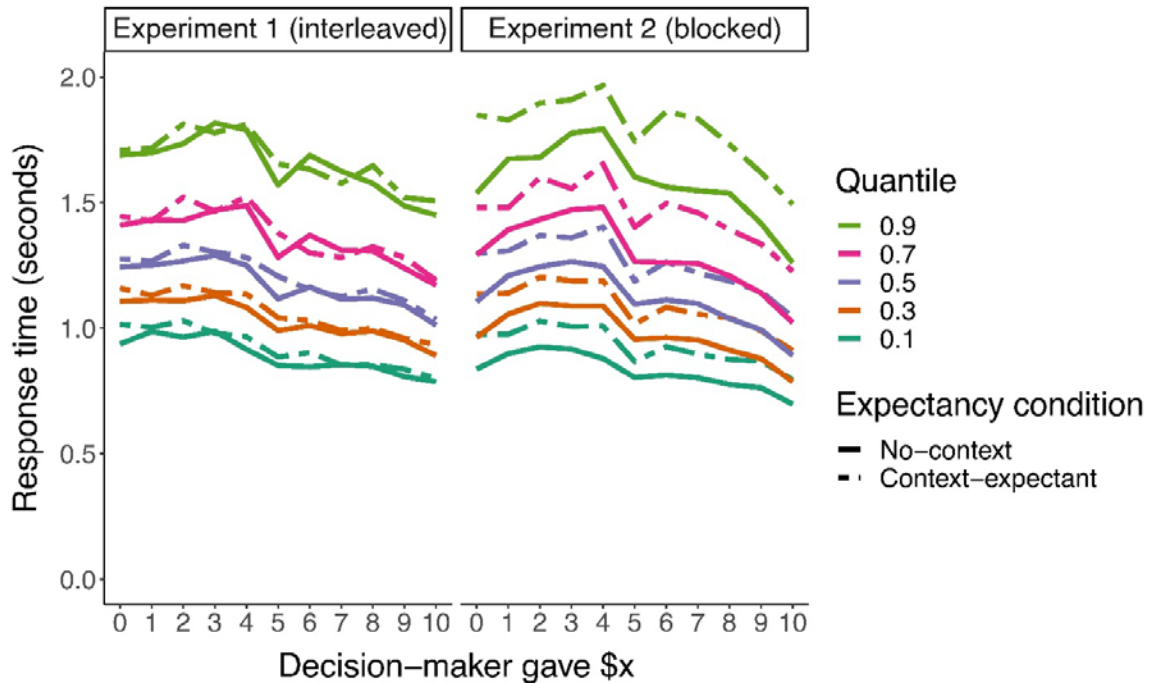

254

255 **Figure 3. Moral Judgement RT quantiles across Decision-maker offers and expectancy**

256 **conditions.** The graph shows group mean quantile values across participants. The general  
257 pattern of results was consistent across quantiles and across two studies: there was a slight  
258 increase in speed for higher Decision-maker offers; and there was a slight slowing in context-  
259 expectancy trials in Experiment 1 (dashed lines higher than solid lines), which was more  
260 pronounced in Experiment 2.

261

262 Next, to better characterise these patterns of RT effects, and to test our predictions  
263 regarding the relationships between context-expectancy, moral valence and components of  
264 the decision process, we fitted a Diffusion Decision Model. To test whether context-  
265 expectancy increased the general amount of caution across judgement options (i.e. boundary  
266 separation), we computed two  $a$  parameters, one for each expectancy condition, and  
267 compared them. We expected:  $a_{context-expectant} > a_{no-context}$ . To test whether moral prototypicality  
268 of Decision-maker's offers reflected stronger evidence for judgement options (with lower  
269 offer magnitude reflecting evidence for "bad" option, and higher offers reflecting stronger

270 evidence for the “good” option, in line with the norms applied by the selected sample), we  
271 fitted a  $v$  parameter separately for each Decision-maker’s offer. The  $v$  parameter was signed,  
272 meaning negative values indicated evidence for “bad” judgement and positive values  
273 indicated evidence for “good” judgement. We tested for a monotonic positive relationship  
274 between the offer magnitude and the  $v$  parameter. Moreover, to test whether negatively  
275 valenced evidence is accumulated more slowly than positively valenced evidence, we tested  
276 whether the estimates of the  $v$  parameter were in absolute terms (drift towards either “good”  
277 or “bad”) larger for high as opposed to low Decision-maker’s offers. We expected:  $|v_{0-d}| < |v_{0-g}|$ .  
278 Finally, to test whether participants were more cautious against making “bad” judgements,  
279 independent of the tendency to more slowly accumulate negatively valenced information, we  
280 tested whether the  $z$  parameter differed from .5 (which would indicate no starting point bias),  
281 and whether the  $z$  parameter was biased in the direction of ‘morally good’ judgement. The  
282 position of decision bounds with respect to the starting point were standardized as 1 for  
283 ‘morally good’, and 0 for ‘morally bad’ judgements, hence we expected  $z > .5$ .

284 First, we formulated a hypothesised model (***m1***), which included separate  $a$   
285 parameters for each expectancy condition, separate  $v$  parameters for every offer value, and a  $z$   
286 parameter. We then tested whether the use of this model, which allowed us to test our specific  
287 hypotheses, was justifiable and appropriately explained our data, by comparing it to a null  
288 model (***m0***), which did not include differences between conditions for any parameter. We  
289 used the Deviance Information Criterion (DIC) to compare the model fits (lower value  
290 indicates better fit)<sup>50</sup>. We found that this model provided a substantially better fit to the data  
291 (Experiment 1 DIC = 13396.303; Experiment 2 DIC = 15021.171) than the null model (***m0***)  
292 (Experiment 1 DIC = 29569.801; Experiment 2 DIC = 30071.387). Additionally, we ran  
293 Posterior Predictive Check (PPC) simulations of the two models. Simulated data from model  
294 ***m1*** more closely resembled the quantile structure of the observed RT data (Supplement 2

295 Figure S10). The *mI* model simulation also reproduced the observed rates of judgements  
296 across Decision-maker offers (Supplement 2 Figure S8) and patterns of changes in RT  
297 distributions across different Decision-maker's offers and expectancy conditions (Supplement  
298 2 Figure S9), and overall provided an excellent fit to the data.

299         Next, we tested for hypothesised differences in the *mI* model parameters across  
300 conditions. Statistical significance was defined as the posterior probability for the  
301 hypothesised difference exceeding .95. Consistent with our hypothesis that context-  
302 expectancy increases caution against making errors, the *a* parameter estimate was nominally  
303 larger in the context-expectant condition compared to the no-context condition; however, this  
304 difference was not statistically significant in Experiment 1 (posterior  $P(a_{context-expectant} > a_{no-}$   
305  $context) = 0.913$ ) (Figure 4a). In Experiment 2 this difference was statistically significant  
306 (posterior  $P(a_{context-expectant} > a_{no-context}) > 0.999$ , Figure 4b). As for the drift rate (*v*), we  
307 expected this parameter to monotonically increase with the value of the Decision-maker's  
308 offer. We observed a perfect monotonic relationship across both experiments (see Figure 4c  
309 and d). To test our hypotheses regarding the reduction in absolute drift rate when processing  
310 negative moral valence as compared to positive valence, we compared the *v* parameter for  
311 negative stimuli (Decision-maker gave \$0-4) with positive stimuli (Decision-maker gave \$6-  
312 10). Consistent with our hypothesis we found a large and statistically significant decrease in  
313 absolute drift-rate for negative stimuli (Experiment 1 posterior  $P(|v_{0-4}| < |v_{6-10}|) > 0.999$ ;  
314 Experiment 2 posterior  $P(|v_{0-4}| < |v_{6-10}|) > 0.999$ , see Figure 4c and d). To ensure that this  
315 effect was not due to a perception of Decision-maker's offer of \$4 as neutral as opposed to  
316 negative, we repeated these analyses on a more constrained set of stimuli by excluding offers  
317 \$4 and \$6, and the effect survived in both studies (Experiment 1 posterior  $P(|v_{0-3}| < |v_{7-10}|) =$   
318  $0.999$ ; Experiment 1 posterior  $P(|v_{0-3}| < |v_{7-10}|) = 0.999$ ). To test our hypothesis regarding the  
319 shift of the bias parameter (*z*) away from the 'bad' and toward the 'good' judgement option,

320 we tested whether the  $z$  parameter was larger than .5. Consistent with our hypothesis we  
321 found estimates of  $z$  parameter to be larger than .5 in both studies (Experiment 1 posterior  $P(z$   
322  $> 0.5) > 0.999$ ; Experiment 2 posterior  $P(z > 0.5) > 0.999$ ).

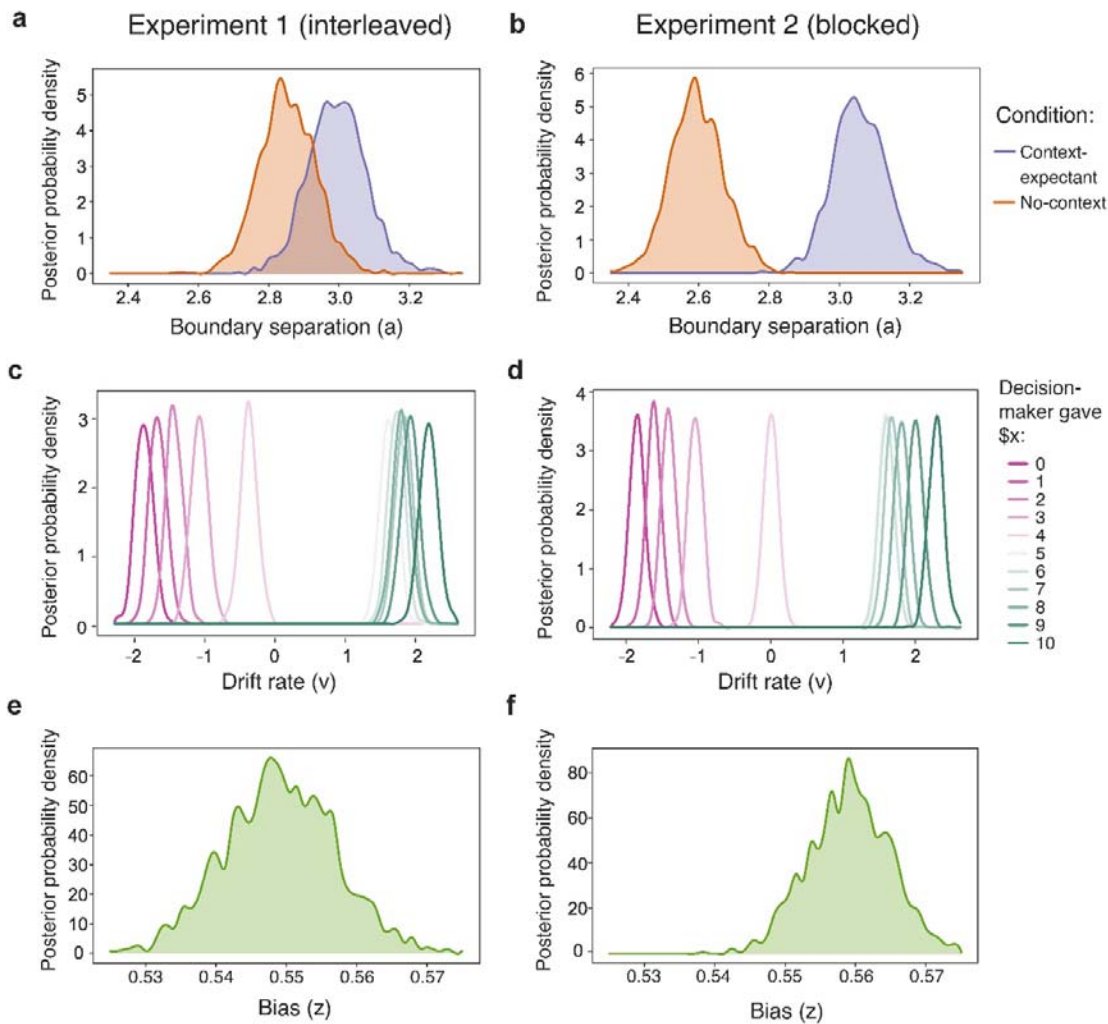

323  
324 **Figure 4. Bayesian posterior probability distributions for Diffusion Decision Model**  
325 **parameters  $a$ ,  $v$  and  $z$  for both Experiments.** (a) In Experiment 1, the boundary separation  
326 parameter ( $a$ ) estimate, although overlapping, was slightly higher for the context-expectant  
327 condition, which is in line with the hypothesis that context-expectancy increases caution. (b)  
328 In Experiment 2, this difference was replicated with a larger effect and there was minimal  
329 overlap between the two posterior distributions. (c) In Experiment 1, the drift rate parameter



330 (v) monotonically increased with higher Decision-maker's offers, suggesting that higher offer  
331 numbers provide more evidence for the judgement option 'good' and less for 'bad'.  
332 Positively valenced actions (DM gave more than 6) had higher absolute drift rates towards  
333 option 'good' than negatively valenced actions did towards option 'bad' (DM gave less than  
334 \$4), which suggests that participants processed negatively valenced actions slower than  
335 positively valenced actions. (d) These effects replicated in Experiment 2. (e) In Experiment 1,  
336 participants showed a bias towards judging 'good' ( $z$  parameter  $>.5$ ), which is in line with the  
337 hypothesis that people may be more cautious when making negative judgements. (f) This  
338 effect replicated in Experiment 2.

## 339 Discussion

340 We investigated the effects of context-expectancy and negative moral valence on  
341 moral decision caution in third-party moral judgements of sharing actions. Both factors were  
342 hypothesised to slow moral judgements, albeit impacting different aspects of the decision-  
343 making process. Specifically, we examined these effects by comparing RTs and parameter  
344 values of the DDM across judgements of fairness-related actions (i.e. offers of different  
345 magnitudes) as well as context-expectancy conditions. Our results show a significant slowing  
346 of RT in the context-expectancy conditions, as well as for morally negative actions; however,  
347 there was no interaction between the two factors. Moreover, these effects were well  
348 accounted for by differences in multiple DDM parameters. The boundary separation  
349 parameter was larger in the context-expectancy condition compared to the no-context  
350 condition, pointing to more caution to avoid erroneous responses (across judgement options)  
351 in the former condition. In addition, signed drift rates increased with the Decision-maker's  
352 offer, suggesting that lower offers corresponded to stronger evidence for negative judgments  
353 and higher offers corresponded to stronger evidence for positive judgements. Absolute drift  
354 rates were smaller for negatively valenced offers, supporting the notion that negative

355 evidence is accumulated at a slower rate than positive evidence, for reasons most likely not  
356 related to moral decision caution per se. Additionally, the starting point parameter showed a  
357 bias against “bad” judgements, suggesting that people also slowed their negative judgements  
358 as they were particularly cautious about them.

359 Our findings that participants slowed their judgments when expecting contextual  
360 information is consistent with previous research showing that people are more cautious when  
361 aware that they are more prone to making mistakes<sup>24,25</sup>. Notably, previous research has  
362 demonstrated this effect for decision mistakes in tasks in which people are not given  
363 additional information or a chance to change their minds<sup>24,25</sup>. The current findings show that  
364 this effect also extends to dynamic decision-making contexts, in which learning additional  
365 information can lead to changes of mind. Crucially, here we show that this type of caution  
366 can be explained by the widening of the decision boundary separation in a process model of  
367 decision-making.

368 Finding that the expectancy of contextual information increases the boundary  
369 separation also highlights the importance of contextual information for moral judgements.  
370 This finding is consistent with previous research that showed that contextual information  
371 influences the judgements that we make<sup>2-8</sup>, and that some people make less extreme good/bad  
372 judgements when expecting contextual information<sup>9</sup>. To note, we did not find an adjustment  
373 of the judgement itself (see Figure 2), but the relatively coarse four-point scale might not  
374 have been ideal to capture any potential subtle effects that might have occurred but could not  
375 be expressed without a finer scale. The difference in response times, however, was observed  
376 even though the expected contextual information could never directly impact the initial  
377 judgment. This is important because it shows that context-dependent norms affect our  
378 judgements even when contextual information is not yet known, a point which has been  
379 overlooked in the moral judgement literature.

380           We further found that participants were slower when evaluating lower offers, which is  
381 in line with both the idea that people take longer to process negative evidence<sup>29–32</sup>, as well as  
382 with the idea people are more cautious against judging people as bad, as negative judgements  
383 have higher social repercussions for individuals<sup>27,28</sup>. Our DDM results further support each of  
384 these accounts separately. Firstly, our finding that the drift rate was slower for lower offers as  
385 compared to higher offers is in line with the idea that people accumulate negative evidence at  
386 a slower rate<sup>29–32</sup>. Secondly, we found that participants showed biases, or caution, against  
387 judging moral actions as bad, independent of taking longer to process negative evidence.  
388 Previous research on financial decision-making showed similar bias parameter shifts away  
389 from options associated with less favourable monetary outcomes<sup>21–23,26</sup>. Our results extend  
390 these findings to moral judgement valence, suggesting that people are inclined to default to  
391 positive judgements. This may be because of the sensitivity of the bias parameter to social  
392 outcomes, such as the repercussions that come with placing moral blame improperly<sup>27,28</sup>.  
393 Overall, our findings suggest that people take longer to make judgements about negative  
394 actions both because it takes them longer to process negative information, and because they  
395 favour positive judgements.

396           Our finding that people have biased caution against making negative judgements  
397 complements recent findings showing that people are more prone to adjust and change  
398 negative rather than positive beliefs about others<sup>28</sup>. Although negative beliefs are more  
399 susceptible to change, our results suggest that people are more cautious to form these beliefs  
400 in the first place. Together, these findings suggest that people are more careful about being  
401 accurate when evaluating morally negative evidence, both in terms of changing their minds  
402 when receiving information updates<sup>9,28</sup>, and by allowing themselves time to consider all the  
403 information that is available when prompted to make a judgement.

404 Our finding that signed drift rates showed a monotonic relationship with the  
405 magnitude of Decision-makers' offers is in line with the idea that moral prototypicality of the  
406 action determines the quality of evidence for moral badness and goodness. Previous research  
407 showed that drift rate scales with perceptual discriminability of the stimuli in classical  
408 perceptual decision tasks<sup>21</sup>. Our findings suggest that this effect generalizes to moral  
409 decisions, which is in line with the idea that moral prototypicality (i.e. how well a moral  
410 action represents adherence to or deviation from a moral norm) equates to moral  
411 discriminability and determines the rate of moral decision evidence accumulation.

412 We did not find support for our hypothesis that context-expectancy would interact  
413 with the moral valence effect. Our RT results instead suggest that these two effects were  
414 additive. These results are somewhat in discord with a previous finding that some participants  
415 reduced the intensity of their negative moral judgements (but not positive moral judgements)  
416 when expecting a contextual update<sup>9</sup>. There are several explanations for this discrepancy.  
417 This previous finding may be specific to moral judgements reported on a continuous scale. It  
418 may also occur only in smaller subset of people. Our strict focus on a subsample of people  
419 that condemn low offers may have excluded the people that reduce the intensity of this  
420 condemnation and show this effect. Future studies could preselect samples of people who  
421 show this effect and characterise their decision process specifically.

422 There are several remaining open questions that should be investigated in future  
423 studies. One outstanding question is whether the DDM can be applied to better characterise  
424 aspects of moral decision-making across a wider range of contexts. While the DDM has  
425 primarily been used to derive psychologically meaningful parameters in perceptual decision  
426 tasks<sup>33,36,37,42</sup>, and has only been applied to a small range of social and more specifically  
427 moral tasks<sup>44-46,51,52</sup>, our results illustrate that the DDM can be a powerful tool for  
428 dissociating parts of the decision-making process in social tasks. Our findings show that the

429 DDM can be used to clearly partition RT variance in such tasks, and the consistency of  
430 results across two samples suggest that this partitioning is reliable. Future studies could test  
431 how well our findings generalize to other kinds of judgement tasks (e.g., traditional moral  
432 dilemmas), other moral norms (e.g., concerning harm), and other kinds of contextual  
433 information (e.g., relational status between moral actors). It could further be tested whether  
434 there is an even better model within the DDM framework to capture the process of moral  
435 judgement. We have restricted our analyses to the most plausible (and hypothesis driven)  
436 model instead of exploring the full space of all possible models, which was beyond the scope  
437 of our study. Future research, however, can extend this framework, for example by including  
438 parameters such as collapsing decision bounds<sup>42,53,54</sup>, or by allowing for inter-trial variability  
439 of some parameters<sup>55,56</sup> to further improve the model fit; however additional theoretical work  
440 is needed to justify inclusion of such variations for the current context. Additionally, our  
441 study remains agnostic to neural mechanisms behind the moral decision process. To better  
442 understand the computation behind moral decisions, future studies should investigate the  
443 neural correlates of these computations.

444 To conclude, our findings identify expectancy of learning new contextual information and  
445 moral valence as impacting two distinct forms of moral decision caution. While context  
446 expectancy slows moral judgements to reduce erroneous responding in general, negatively  
447 valenced information also leads to slower judgements, presumably reducing the likelihood of  
448 making an erroneous negative judgement. Additionally, we also show that this effect of  
449 negative valence occurs in addition to another effect – that negative evidence is accumulated  
450 at a slower rate than positive evidence. These findings improve our understanding of  
451 processes underlying moral decision-making in dynamic situations and provide a foundation  
452 for future research on neural mechanisms underlying moral decisions.

453

## Materials and Methods

### 454 Participants

455 The study was approved by the Human Research Ethics Committee of the Melbourne  
456 School of Psychological Sciences (Ethics ID 1750046.3). Participants were compensated with  
457 course credit or monetary remuneration (\$15). Participants were right-handed, fluent in  
458 English, and had normal or corrected-to-normal vision.

459 For Experiment 1 (interleaved design), 77 people participated (50 female, 27 male,  
460  $M_{age} = 24.70$ ,  $SD = 7.40$ , range: 18–69 years). Eleven participants were excluded from the  
461 sample for data quality reasons: nine participants failed an attention-check (i.e. had given  
462 incorrect answers in more than 40% of catch trials of either category; see below), and two  
463 participants had missing responses for over 5% of trials, again suggesting a lack of attention.  
464 We preselected the final sample such that all included participants would rely on the same  
465 moral norms to make their judgements. This was done to avoid possible confounding of  
466 response times due to potential differences in norm-related information processing across  
467 norms, and to ensure that all participants were assigning moral meaning to presented stimuli  
468 in a similar manner (which is a necessary assumption of the DDM when fit for a group of  
469 participant datasets). Based on previous research using a similar task, we expected the largest  
470 group to be participants who endorsed high and condemned low offers<sup>9</sup>. A strong positive  
471 correlation between moral judgements and Decision-maker's offer was typical for this largest  
472 group. We excluded eleven participants who did not show this strong positive correlation  
473 (Spearman correlation was below  $r = .5$ ). All of these criteria were predefined and  
474 preregistered (<http://aspredicted.org/blind.php?x=n2fi7g>). The final sample consisted of 55  
475 participants (37 female, 18 male,  $M_{age} = 24.84$ ,  $SD = 5.86$ , range: 18–43 years).

476 For Experiment 2 (blocked design), 76 members of the University of Melbourne  
477 community were recruited (47 female, 28 male, 1 other,  $M_{age} = 24.29$ ,  $SD = 3.77$ , range: 19–

478 39 years). Nine participants were excluded to ensure data quality: six participants failed the  
479 attention-check criterion (see above) and three had missing responses for over 5% of trials.  
480 Another ten participants were excluded because their moral judgements did not correlate  
481 strongly with the Decision-maker's offer (Spearman correlation  $r < .6$ ). All of these criteria  
482 were predefined and preregistered (<https://aspredicted.org/blind.php?x=dy3qk9>). The final  
483 sample consisted of 57 participants (38 female, 18 male, 1 other,  $M_{age} = 24.34$ ,  $SD = 3.80$ ,  
484 range: 20–39 years).

485 **Apparatus.** The experimental task was programmed in MATLAB (MathWorks,  
486 version R2015b) and presented using PsychToolbox-3<sup>57</sup>. Participants sat at a viewing  
487 distance of approximately 80 cm from the monitor (ASUS ROG Swift PQ258Q 24.5" HD  
488 with a 60 Hz screen refresh rate). The experiment was conducted in a well-lit solitary room.  
489 Participants made responses on a black Hewlett-Packard KU1469 QWERTY keyboard. The  
490 “z”, “x”, “.” and “/” keys were covered with white stickers to indicate to participants that  
491 these were the primary buttons to be used in the experiment. They were instructed to place  
492 their fingers on these keys in preparation for every trial in the following manner: the middle  
493 finger and the index finger of their left hand were to be placed on the “z” and “x” keys,  
494 respectively, and the index finger and the middle finger of their right hand were to be placed  
495 on the “.” and “/” keys, respectively.

## 496 **Experimental Paradigm**

497 **Cover Story.** Participants first read a cover story about a recently conducted  
498 experiment investigating people's economic decisions. This experiment was fictional, but  
499 participants were not informed of this. In the fictional experiment a group of people, assigned  
500 to pairs, completed a two-round variant of the dictator game (for the original dictator game,  
501 see ref<sup>58</sup>). In the first round, one person (the “Decision-maker”) in each pair was given \$10  
502 and decided how much thereof to share with their partner, the “Receiver”, to whom they

503 could give any whole dollar portion (i.e. any amount \$0–\$10). In the second round, the same  
504 task was repeated except with people taking new roles — first round Decision-makers  
505 became Receivers in the second round — and were assigned different partners. Some of these  
506 new partners were Decision-makers in the first round of the experiment (“Old Receivers”)  
507 and some of them were not (“New Receivers”). Importantly, second round Decision-makers  
508 were aware whether their partner was an Old Receiver or a New Receiver. If their partner  
509 was an Old Receiver, they were also aware how much money their partner had shared with  
510 another person in the first round of the experiment. A visualisation of this cover story is  
511 shown in Figure 1a.

512         **Instructions.** This cover story along with the description of the experimental task  
513 were presented to participants via text interleaved with animated depictions. Participants read  
514 the instructions and attended to animations at their own pace. Participants were then required  
515 to pass, with 100% accuracy, a test comprised of 32 true–false questions which assessed their  
516 understanding of both the cover story and the experiment instructions. Participants could  
517 attempt this instruction-check test three times. If they experienced troubles completing the  
518 quiz, participants could return to the cover story or instruction presentations to clarify their  
519 understanding or ask questions of the experimenters for the same. Participants were required  
520 to pass this test before continuing to the experiment.

521         **Experimental task.** Participants were asked to observe a series of independent  
522 transactions that various Decision-makers made towards various Receivers as described in  
523 the cover story. Each trial started with the participant being shown, for 3 s, whether the  
524 Receiver for that trial was an “OLD Receiver” (for context-expectant trials) or a “NEW  
525 Receiver” (for no-context trials) which corresponded to whether the Receiver participated in  
526 the first round of the fictitious experiment. Then, a fixation cross was presented in the middle  
527 of the screen for 2 s. Participants were then presented with the phrase "Decision-maker gave:



528 \$y" where y was an integer from the set  $Y = \{0, 1, 2, \dots, 10\}$  ("Decision-maker offer").  
529 Simultaneously, response options "very bad", "bad", "good" and "very good" were presented  
530 below the Decision-maker offer. Participants selected their response, with a maximum  
531 response window of 3 s, to indicate how morally good or bad they believed this Decision-  
532 maker's action was by pressing the button on the keyboard corresponding to the position of  
533 the presented option. To control for possible RT differences that could arise due to  
534 differences in motor execution across different fingers, participants were randomly assigned  
535 one of four possible mappings of responses to buttons, and this mapping remained the same  
536 throughout the experiment. Four mappings were selected to ensure that across participants  
537 any of the four fingers was mapped onto each response option. For consistency, none of the  
538 mappings had a monotonically increasing or decreasing order in space.

539         Once participants made their response, the corresponding response option  
540 immediately changed colour to yellow until the 3 s time-limit had elapsed (or for 0.3 s if the  
541 judgment was made between 2.7 s and 3 s) before reverting to white. This was done to assure  
542 participants that their response had been recorded.

543         Participants were then shown another fixation cross above this information for 0.5 s.  
544 The stimuli presented next differed depending on the experimental condition of the trial. In  
545 context-expectant trials, participants were presented with the phrase "Receiver gave: \$x",  
546 where x was an integer from the set  $X = \{0, 1, 2, \dots, 10\}$ , providing the contextual  
547 information of how much the Receiver had given when they were a Decision-maker the first  
548 round. In the no-context trials, participants were presented with the phrase "NEW Receiver",  
549 reminding them that the Receiver had not participated in the first round, and thus there was  
550 no contextual information about them available. In both conditions, participants made a  
551 second moral judgment, within 3 s, about the Decision-maker's action (not the Receiver's  
552 prior action). Once this response had been made, the corresponding response option changed

553 colour to yellow until the 3 s time-limit had elapsed (or for 0.3 s if the judgment was made  
554 between 2.7 s and 3 s), after which a new trial began.

555         There were 121 trials in each condition, totalling 242 trials per participant. This was  
556 chosen such that in the context-expectant condition, participants made moral judgments about  
557 all possible combinations of the Decision-maker's offer (i.e. Decision-maker gave \$0–\$10)  
558 and the Receiver's prior offer (Receiver gave \$0–\$10;  $11 \times 11 = 121$ ). To ensure there was  
559 symmetry between the experimental conditions, we also included 121 trials for the no-context  
560 condition. In Experiment 1 the order of these 242 trials was randomised for each participant  
561 and the two trial types alternated randomly (i.e. the two conditions were interleaved). In  
562 Experiment 2, we used a version of the experiment with the two expectancy conditions  
563 presented in separate blocks. There were 40-41 trials of the same kind in each block and 6  
564 alternating blocks in total. The order of trials was randomised for each participant, and the  
565 participants were randomly assigned one of the two alternating block sequences.

566         **Questionnaires.** Following the experiment, participants completed various personality  
567 measures. We administered the agreeableness section of the HEXACO Personality Inventory-  
568 Revised (HEXACO)<sup>59</sup>, a brief set of self-report measures for political orientation<sup>60</sup>, the Social  
569 Dominance Orientation scale (SDO)<sup>61</sup>, the Consequentialist Thinking Scale (CTS)<sup>62</sup>, and  
570 basic demographic measures. We will analyse and report the questionnaire results in a  
571 separate publication.

572         **Experiment Feedback and Instruction Checks.** Participants were instructed to  
573 respond as quickly and accurately as possible and always give a response. If they failed to do  
574 so within the 3 s time limit, they were presented with feedback at the end of that trial advising  
575 which response was missing (or both) and to “please make sure you always respond”. Two  
576 types of attention-checks were also dispersed throughout the experiment. In one, participants  
577 were required to report the values seen in the current trial; that is, the amounts that the

578 Decision-maker and/or the Receiver had given. Participants responded by entering this value  
579 into number keys on the keyboard. For the second attention-check participants had to report,  
580 via button press, whether the Receiver in the current trial was an Old Receiver or New  
581 Receiver. Participants were instructed that both these attention-check trials would occur at  
582 random times during the experiment.

### 583 **Statistical Analyses**

584 **Regression Analysis.** RTs for the first moral judgement were modelled with the  
585 Generalised Linear Mixed Models (GLMMs) approach which is a form regression suitable  
586 for hierarchical data (e.g. data of multiple individuals in several conditions) that is not  
587 normally distributed. Invalid trials (i.e. trials without any response) were excluded from all  
588 the analyses (0.72% of all trials in Experiment 1, and 1.17% in Experiment 2). GLMMs are  
589 superior to the common practice of transforming data before applying an ordinary-least-  
590 square linear mixed model<sup>63</sup>. GLMMs were specified as follows: An identity link was used  
591 because it assumes that RTs are direct measures of the duration of the decision process, rather  
592 than functional transformations of this duration<sup>63</sup>. A gamma distribution was used as the  
593 conditional distribution as it provided a good empirical fit to the data. Moreover, gamma-  
594 distributed GLMMs have been used in numerous RT studies with similar tasks<sup>64-67</sup>. Lastly,  
595 random effects were included in the model to account for individual differences.

596 We compared a list of theoretically plausible candidate models which were derived  
597 with an increasingly complex random effects structure, as shown in Supplement 1 Table S1.  
598 For each random effect structure, a model was fit both with and without a fixed interaction  
599 parameter. For all models, the random effects were allowed to correlate; that is, the model  
600 had an unstructured variance-covariance matrix. Model parameters were estimated using  
601 maximum likelihood estimation via the Laplace approximation, implemented with the  
602 *glmmTMB* package<sup>68</sup> in the R statistical programming environment (version 3.6.1). We

603 selected the best fitting model using the Akaike Information Criterion (AIC). AIC was  
604 preferred over the likelihood ratio test, because not all compared models were nested, and  
605 because, unlike the likelihood ratio test, the AIC method helps prevent overfitting<sup>69</sup>. AIC was  
606 also preferred over the Bayesian Information Criterion<sup>70</sup> because it was unlikely that any of  
607 our candidate models are the true model, which better agreed with the assumptions of AIC<sup>71</sup>.  
608 Akaike weights<sup>72</sup> were calculated for all candidate models as a means to quantify the relative  
609 merits of the competing models, and the degree to which one model should be preferred over  
610 the others. Confidence intervals (and where necessary,  $p$  values) for fixed effects were  
611 calculated for most models using Wald's  $z$  method<sup>73</sup>. The fixed parameter effects from the  
612 best fitting model, and their 95% confidence intervals, were then used to test our hypotheses.

613 **Diffusion Decision Model Fitting.** Participants' RT and decision data were fit in the  
614 Python 3.6 programming environment on a High Performance Computing Cluster<sup>74</sup>, using the  
615 Hierarchical Drift Diffusion Model (HDDM) package<sup>75</sup>. This package implements a  
616 hierarchical Bayesian Markov Chain Monte Carlo (MCMC) estimation of the DDM with four  
617 free parameters ( $a$ ,  $v$ ,  $z$ , and  $t$ ). HDDM estimates these parameters for each individual, as well  
618 as at the group level (which are the estimates we report in this publication). This analysis was  
619 not preregistered, but was run separately for Experiment 1 and Experiment 2 samples  
620 allowing us to assess whether the findings replicated across samples. Estimation procedure  
621 implemented in the HDDM package was chosen as it outperforms other estimation  
622 techniques and can accurately recover model parameters based on a small number of  
623 observations per participant, especially for participant sample sizes larger than 20<sup>75</sup>. Since the  
624 DDM is sensitive to outliers, it is recommended to devise exclusion criteria that ensure that  
625 some of the contaminant RTs are excluded whilst ensuring that criteria do not exclude larger  
626 portions of the data (e.g., more than 1%)<sup>76</sup>. We conservatively excluded trials in which  
627 reaction time was faster than 0.2 s (0.05% of valid trials in Experiment 1 and 0.27% of valid

628 trials in Experiment 2), and slower than 2.8 s (0.37% of valid trials in Experiment 1 and  
629 0.37% of valid trials in Experiment 2). The DDM was designed for binary decisions (e.g.,  
630 “good” versus “bad”), which means that in order to model our data using the DDM, we  
631 simplified our data by collapsing across “very good” and “good” responses (*good* judgement)  
632 and across “very bad” and “bad” responses (*bad* judgement). We formulated two models to  
633 address our hypotheses: *m0* – the null model which assumes no difference between  
634 conditions when estimating DDM parameters; *m1* – the hypothesised model, in which  
635 parameter *a* was allowed to vary across two expectancy conditions ( $a_{context-expectant}$  and  $a_{no-}$   
636  $context$ ), and parameter *v* was allowed to vary across the range of values of Decision-Maker’s  
637 offers ( $v_{0-11}$ ). For our Bayesian parameter estimation we used the default non-informative  
638 priors in the HDDM package<sup>75</sup>. This is the recommended option for novel tasks that are  
639 substantially different from typical perceptual decision-making paradigms prominent in the  
640 DDM literature<sup>75</sup>. We obtained parameter estimates by generating a chain of 2500 MCMC  
641 samples of the joint Bayesian probability posterior distributions of all parameters at both  
642 participant and population level, and discarding the first 500 samples (as recommended in ref  
643 <sup>75</sup>). We evaluated chain convergence using Gelman-Rubin diagnostic over five repeated  
644 chains ( $R\hat{\sigma} < 1.1$  for all parameters and at all levels across Experiment 1 and Experiment 2).  
645 The two models – our theoretically plausible *m1* and the null model *m0* – were compared  
646 using the Deviance Information Criterion (DIC) goodness of fit measure, which penalises for  
647 model complexity. Additionally, we also assessed goodness of fit by performing the posterior  
648 predictive check procedure, by which we generated simulated data based on posteriors  
649 estimates and compared it to empirically observed data (Supplement 2 Figures S8-10). After  
650 establishing that the *m1* model outperformed the null model and provided an excellent fit for  
651 our data, we tested our specific hypothesis regarding *a*, *v* and *z* parameters by directly

652 comparing the Bayesian probability posteriors generated by the above-described MCMC  
653 procedure.

#### 654 **Data Availability**

655 Data of all participants, materials including the instructions and the task code, as well as the  
656 analyses scripts that support the findings of this study are publicly available on an Open  
657 Science Framework (OSF) repository (DOI: 10.17605/OSF.IO/EPD63).

#### 658 **References**

- 659 1. Turiel, E. *The Culture of Morality*. (Cambridge University Press, 2001).  
660 doi:10.1017/CBO9780511613500
- 661 2. Miron, A. M., Warner, R. H. & Branscombe, N. R. Accounting for group differences  
662 in appraisals of social inequality: Differential injustice standards. *Br. J. Soc. Psychol.*  
663 **50**, 342–353 (2011).
- 664 3. Sawaoka, T., Newheiser, A.-K. & Dovidio, J. F. Group-based biases in moral  
665 judgment: The role of shifting moral standards. *Soc. Cogn.* **32**, 360–380 (2014).
- 666 4. Olson, J. G., McFerran, B., Morales, A. C. & Dahl, D. W. Wealth and welfare:  
667 Divergent moral reactions to ethical consumer choices. *J. Consum. Res.* **42**, 879–896  
668 (2016).
- 669 5. Haidt, J. & Baron, J. Social roles and the moral judgement of acts and omissions. *Eur.*  
670 *J. Soc. Psychol.* **26**, 201–218 (1996).
- 671 6. Simpson, A., Laham, S. M. & Fiske, A. P. Wrongness in different relationships□:  
672 Relational context effects on moral judgment. *J. Soc. Psychol.* **156**, 594–609 (2016).
- 673 7. Feather, N. T. & Deverson, N. H. Reactions to a motor-vehicle accident in relation to  
674 mitigating circumstances and the gender and moral worth of the driver. *J. Appl. Soc.*

- 675            *Psychol.* **30**, 77–95 (2000).
- 676    8.    Feather, N. T. Judgments of deservingness: Studies in the psychology of justice and  
677            achievement. *Personal. Soc. Psychol. Rev.* **3**, 86–107 (1999).
- 678    9.    Andrejević, M., Feuerriegel, D., Turner, W., Laham, S. & Bode, S. Moral judgements  
679            of fairness-related actions are flexibly updated to account for contextual information.  
680            *Sci. Rep.* **10**, 17828 (2020).
- 681    10.   Shapiro, E. G. Effect of expectations of future interaction on reward allocations in  
682            dyads: Equity or equality. *J. Pers. Soc. Psychol.* **31**, 873–880 (1975).
- 683    11.   Deutsch, M. Equity, equality, and need: What determines which value will be used as  
684            the basis of distributive justice? *J. Soc. Issues* **31**, 137–149 (1975).
- 685    12.   Hysom, S. J. & Fişek, M. H. Situational determinants of reward allocation: The equity-  
686            equality equilibrium model. *Soc. Sci. Res.* **40**, 1263–1285 (2011).
- 687    13.   Diekmann, A. The power of reciprocity: Fairness, reciprocity, and stakes in variants of  
688            the dictator game. *J. Conflict Resolut.* **48**, 487–505 (2004).
- 689    14.   Fehr, E. & Fischbacher, U. Third-party punishment and social norms. *Evol. Hum.*  
690            *Behav.* **25**, 63–87 (2004).
- 691    15.   Nowak, M. A. & Sigmund, K. Evolution of indirect reciprocity by image scoring.  
692            *Nature* **393**, 573–577 (1998).
- 693    16.   Meristo, M. & Surian, L. Do infants detect indirect reciprocity? *Cognition* **129**, 102–  
694            113 (2013).
- 695    17.   Adams, J. S. Inequity in social exchange. in *Advances in Experimental Social*  
696            *Psychology* (ed. Berkowitz, L.) **2**, 267–299 (Academic Press, 1965).

- 697 18. Messick, D. M. & Schell, T. Evidence for an equality heuristic in social decision  
698 making. *Acta Psychol. (Amst)*. **80**, 311–323 (1992).
- 699 19. Fehr, E. & Schmidt, K. M. A theory of fairness, competition, and cooperation. *Q. J.*  
700 *Econ.* **114**, 817–868 (1999).
- 701 20. Forstmann, B. U. *et al.* Cortico-striatal connections predict control over speed and  
702 accuracy in perceptual decision making. *Proc. Natl. Acad. Sci. U. S. A.* **107**, 15916–  
703 15920 (2010).
- 704 21. Voss, A., Rothermund, K. & Voss, J. Interpreting the parameters of the diffusion  
705 model: An empirical validation. *Mem. Cogn.* **32**, 1206–1220 (2004).
- 706 22. Green, N., Biele, G. P. & Heekeren, H. R. Changes in neural connectivity underlie  
707 decision threshold modulation for reward maximization. *J. Neurosci.* **32**, 14942–14950  
708 (2012).
- 709 23. Starns, J. J. & Ratcliff, R. Age-related differences in diffusion model boundary  
710 optimality with both trial-limited and time-limited tasks. *Psychon. Bull. Rev.* **19**, 139–  
711 145 (2012).
- 712 24. Dunovan, K. & Verstynen, T. Errors in action timing and inhibition facilitate learning  
713 by tuning distinct mechanisms in the underlying decision process. *J. Neurosci.* **39**,  
714 2251–2264 (2019).
- 715 25. Bond, K., Dunovan, K. & Verstynen, T. Value-conflict and volatility influence distinct  
716 decision-making processes. in (2019). doi:10.32470/ccn.2018.1068-0
- 717 26. Summerfield, C. & Koechlin, E. Economic value biases uncertain perceptual choices  
718 in the parietal and prefrontal cortices. *Front. Hum. Neurosci.* **4**, 1–12 (2010).
- 719 27. Monroe, A. E. & Malle, B. F. People systematically update moral judgments of blame.



- 720 *J. Pers. Soc. Psychol.* **116**, 215–236 (2019).
- 721 28. Siegel, J. Z., Mathys, C., Rutledge, R. B. & Crockett, M. J. Beliefs about bad people  
722 are volatile. *Nat. Hum. Behav.* **2**, 750–756 (2018).
- 723 29. Abele, A. Thinking about thinking: Causal, evaluative and finalistic cognitions about  
724 social situations. *Eur. J. Soc. Psychol.* **15**, 315–332 (1985).
- 725 30. Fiske, S. T. Attention and weight in person perception: The impact of negative and  
726 extreme behavior. *J. Pers. Soc. Psychol.* **38**, 889–906 (1980).
- 727 31. Pratto, F. & John, O. P. Automatic vigilance: The attention-grabbing power of  
728 approach- and avoidance-related social information. *J. Personal. Soc. Psychol.* **61**,  
729 380–391 (1991).
- 730 32. Baumeister, R. F., Bratslavsky, E., Finkenauer, C. & Vohs, K. D. Bad is stronger than  
731 good. *Rev. Gen. Psychol.* **5**, 323–370 (2001).
- 732 33. Ratcliff, R. A theory of memory retrieval. *Psychol. Rev.* **85**, 59–108 (1978).
- 733 34. Smith, P. L. & Ratcliff, R. Psychology and neurobiology of simple decisions. *Trends*  
734 *in Neuroscience* **27**, 161–168 (2004).
- 735 35. Ratcliff, R., Smith, P. L., Brown, S. D. & McKoon, G. Diffusion Decision Model:  
736 Current issues and history. *Trends Cogn. Sci.* **20**, 260–281 (2016).
- 737 36. Ratcliff, R., Gomez, P. & McKoon, G. A diffusion model account of the lexical  
738 decision task. *Psychol. Rev.* **111**, 159–182 (2004).
- 739 37. Gomez, P., Ratcliff, R. & Perea, M. A model of the go/no-go task. *J. Exp. Psychol.*  
740 *Gen.* **136**, 389–413 (2007).
- 741 38. Kiani, R. & Shadlen, M. N. Representation of confidence associated with a decision by

- 742 neurons in the parietal cortex. *Science* **324**, 759–764 (2009).
- 743 39. Ratcliff, R., Thapar, A. & McKoon, G. A diffusion model analysis of the effects of  
744 aging on recognition memory. *J. Mem. Lang.* **50**, 408–424 (2004).
- 745 40. Cook, E. P. & Maunsell, J. H. R. Dynamics of neuronal responses in macaque MT and  
746 VIP during motion detection. *Nat. Neurosci.* **5**, 985–994 (2002).
- 747 41. Gold, J. I. & Shadlen, M. N. The neural basis of decision making. *Annual Review of*  
748 *Neuroscience* **30**, 535–574 (2007).
- 749 42. Milosavljevic, M., Malmaud, J., Huth, A., Koch, C. & Rangel, A. The Drift Diffusion  
750 Model can account for the accuracy and reaction time of value-based choices under  
751 high and low time pressure. *Judgm. Decis. Mak.* **5**, 437–449 (2010).
- 752 43. Gallotti, R. & Grujić, J. A quantitative description of the transition between intuitive  
753 altruism and rational deliberation in iterated Prisoner’s Dilemma experiments. *Sci.*  
754 *Rep.* **9**, 1–11 (2019).
- 755 44. Hutcherson, C. A., Bushong, B. & Rangel, A. A neurocomputational model of  
756 altruistic choice and its implications. *Neuron* **87**, 451–463 (2015).
- 757 45. Son, J. Y., Bhandari, A. & Feldman Hall, O. Crowdsourcing punishment: Individuals  
758 reference group preferences to inform their own punitive decisions. *Sci. Rep.* **9**, 1–15  
759 (2019).
- 760 46. Pärnamets, P. *et al.* Biasing moral decisions by exploiting the dynamics of eye gaze.  
761 *Proc. Natl. Acad. Sci. U. S. A.* **112**, 4170–4175 (2015).
- 762 47. Plassmann, H., O’Doherty, J. & Rangel, A. Orbitofrontal cortex encodes willingness to  
763 pay in everyday economic transactions. *J. Neurosci.* **27**, 9984–9988 (2007).

- 764 48. Basten, U., Biele, G., Heekeren, H. R. & Fiebach, C. J. How the brain integrates costs  
765 and benefits during decision making. *Proc. Natl. Acad. Sci.* **107**, 21767–21772 (2010).
- 766 49. Andrejević, M. *et al.* How do basic personality traits map onto moral judgements of  
767 fairness-related actions? *PsyArXiv* (2020). Preprint at  
768 <https://doi.org/10.31234/osf.io/e3uxb>
- 769 50. Spiegelhalter, D. J., Best, N. G., Carlin, B. P. & Van Der Linde, A. Bayesian measures  
770 of model complexity and fit. *J. R. Stat. Soc. Ser. B Stat. Methodol.* **64**, 583–616  
771 (2002).
- 772 51. Pärnamets, P., Richardson, D. & Balkenius, C. Modelling moral choice as a diffusion  
773 process dependent on visual fixations. *Proc. Annu. Meet. Cogn. Sci. Soc.* (2014).
- 774 52. Pärnamets, P. *et al.* Changing minds by tracking eyes: Dynamical systems, gaze and  
775 moral decisions. *Proc. Annu. Meet. Cogn. Sci. Soc.* 1115–1120 (2013).
- 776 53. Ditterich, J. Stochastic models of decisions about motion direction: Behavior and  
777 physiology. *Neural Networks* **19**, 981–1012 (2006).
- 778 54. Churchland, A. K., Kiani, R. & Shadlen, M. N. Decision-making with multiple  
779 alternatives. *Nat. Neurosci.* **11**, 693–702 (2008).
- 780 55. Ratcliff, R. & Rouder, J. N. Modeling response times for two-choice decisions.  
781 *Psychological Science* **9**, (1998).
- 782 56. Ratcliff, R. Parameter variability and distributional assumptions in the diffusion  
783 model. *Psychol. Rev.* **120**, 281–292 (2013).
- 784 57. Kleiner, M. *et al.* What’s new in Psychtoolbox-3? *Perception* (2007).  
785 [doi:10.1068/v070821](https://doi.org/10.1068/v070821)

- 786 58. Güth, W., Schmittberger, R. & Schwarze, B. An experimental analysis of ultimatum  
787 bargaining. *J. Econ. Behav. Organ.* **3**, 367–388 (1982).
- 788 59. Lee, K. & Ashton, M. C. Psychometric properties of the HEXACO-100. *Assessment*  
789 **25**, 543–556 (2018).
- 790 60. Graham, J., Haidt, J. & Nosek, B. A. Liberals and conservatives rely on different sets  
791 of moral foundations. *J. Pers. Soc. Psychol.* **96**, 1029–1046 (2009).
- 792 61. Ho, A. K. *et al.* The nature of social dominance orientation: Theorizing and measuring  
793 preferences for intergroup inequality using the new SDO $\alpha$  scale. *J. Pers. Soc. Psychol.*  
794 **109**, 1003–1028 (2015).
- 795 62. Piazza, J. & Sousa, P. Religiosity, political orientation, and consequentialist moral  
796 thinking. *Soc. Psychol. Personal. Sci.* **5**, 334–342 (2013).
- 797 63. Lo, S. & Andrews, S. To transform or not to transform: using generalized linear mixed  
798 models to analyse reaction time data. *Front. Psychol.* **6**, 1–16 (2015).
- 799 64. De Boeck, P. & Jeon, M. An overview of models for response times and processes in  
800 cognitive tests. *Front. Psychol.* **10**, (2019).
- 801 65. Maris, E. Additive and multiplicative models for gamma distributed random variables,  
802 and their application as psychometric models for response times. *Psychometrika* **58**,  
803 445–469 (1993).
- 804 66. Palmer, E. M., Horowitz, T. S., Torralba, A. & Wolfe, J. M. What are the shapes of  
805 response time distributions in visual search? *J. Exp. Psychol. Hum. Percept. Perform.*  
806 **37**, 58–71 (2011).
- 807 67. Zandt, T. Van. Analysis of response time distributions. *Stevens' Handbook of*  
808 *Experimental Psychology* (2002). doi:doi:10.1002/0471214426.pas0412

- 809 68. Brooks, M. E. *et al.* glmmTMB balances speed and flexibility among packages for  
810 zero-inflated generalized linear mixed modeling. *R J.* **9**, 378–400 (2017).
- 811 69. Akaike, H. A new look at the statistical model identification. *IEEE Trans. Automat.*  
812 *Contr.* **19**, 716–723 (1974).
- 813 70. Schwarz, G. Estimating the dimension of a model. *Ann. Stat.* **6**, 461–464 (1978).
- 814 71. Vrieze, S. I. Model selection and psychological theory: A discussion of the differences  
815 between the Akaike information criterion (AIC) and the Bayesian information criterion  
816 (BIC). *Psychol. Methods* **17**, 228–243 (2012).
- 817 72. Wagenmakers, E. J. & Farrell, S. AIC model selection using Akaike weights. *Psychon.*  
818 *Bull. Rev.* **11**, 192–196 (2004).
- 819 73. Bolker, B. M. *et al.* Generalized linear mixed models: a practical guide for ecology and  
820 evolution. *Trends Ecol. Evol.* **24**, 127–135 (2009).
- 821 74. Meade, B., Lafayette, L., Sauter, G. & Tosello, D. Spartan HPC-Cloud hybrid:  
822 Delivering performance and flexibility. (2017). doi:10.4225/49/58ead90dceaaa
- 823 75. Wiecki, T. V., Sofer, I. & Frank, M. J. HDDM: Hierarchical bayesian estimation of the  
824 drift-diffusion model in Python. *Front. Neuroinform.* **7**, 1–10 (2013).
- 825 76. Ratcliff, R. Estimating parameters of the diffusion model: Approaches to dealing with  
826 contaminant reaction times and parameter variability. **9**, 438–481 (2002).

827

## 828 **Acknowledgements**

829 We thank Pragya Arora for her help with data collection as well as Gabriel Ong and William  
830 Turner for helpful discussions.

831

### **Author Information**

832 **Contributions**

833 M.A., S.B., and D.F. contributed to conception and design. M.A. programmed the  
834 experiment. M.A. and J.W. collected and analysed data. M.A. drafted the article. All authors  
835 reviewed and revised the manuscript.

836

### **Ethics Declarations**

837 **Competing Interests**

838 This research was supported by an Australian Research Council grant (ARC DP160103353)  
839 to S.B. The authors declare no other competing interests.

840

841 **Supplement 1: Regression Analysis (GLMMs)**

842 **Model Fitting**

843 Comparison of AICs across six candidate models (described in Table S1) in Experiment 1  
844 showed the best model fit for model 5 (see Table S2). This was replicated in Experiment 2.  
845 AIC weights for the winning model indicated that the probability that it is the best model of  
846 the whole candidate set is very high (95.1% chance for Experiment 1 and 99.9% chance for  
847 Experiment 2). These model comparisons suggest there was no interaction effect in the data.  
848 Further, even in models that included the interaction as a fixed effect (e.g., models 2 and 4),  
849 this effect was not significant across two samples. Finally, the Nakagawa conditional  $R^2$  for  
850 the winning model indicates random and fixed predictor variables explain a high portion of  
851 variance in the model (35.7% in Experiment 1 and 31.8% in Experiment 2). Nakagawa  
852 marginal  $R^2$  indicates that a notable portion of model variance is explained by the fixed  
853 predictor variables (4.9% in Experiment 1 and 7.9% in Experiment 2).  
854 The winning model can be mathematically described as follows:

$$\begin{aligned} E[RT_{ij} | DMgave_{ij}, RCtype_{ij}] \\ &= \lambda_{00} + \mu_{0j} + (\lambda_{10} + \mu_{1j})DMgave_{ij} + (\lambda_{20} + \mu_{2j})RCtype_{ij} \\ RT_{ij} | DMgave_{ij}, RCtype_{ij} &\sim Gamma(E[RT_{ij} | DMgave_{ij}, RCtype_{ij}], \phi) \end{aligned}$$

855 where:

$i$  = trial

$j$  = participant

$\phi$

= dispersion parameter, which remains constant for different  $E[RT_{ij} | DMgave_{ij}, RCtype_{ij}]$

$\mu_{0j} \sim N(0, \sigma_0^2)$

$\mu_{1j} \sim N(0, \sigma_1^2)$

$\mu_{2j} \sim N(0, \sigma_2^2)$

856

857 That is, the best fitting model had random participant-level effects for the intercept ( $\mu_{0j}$ ),  
858 DMgave ( $\mu_{1j}$ ) and RCtype ( $\mu_{2j}$ ); and fixed trial-level effects for the intercept ( $\lambda_{00}$ ), DMgave  
859 ( $\lambda_{10}$ ) and RCtype ( $\lambda_{20}$ ). Analysis of the fixed effects estimates shows that there was a  
860 significant negative effect for Decision-maker offer and a significant positive effect for  
861 context-expectancy (Table S2). Table S3 lists the random-effects structure of the model.

862 Other models were also evaluated and compared to ensure that the parameter estimates in this  
 863 model were robust to assumption violations, and not a mere artefact of our choice of  
 864 conditional distribution and link function (i.e. a gamma conditional distribution and identity  
 865 link function). The fixed effect parameters and their standard errors are approximately equal  
 866 when a log link function was used (Table S4). Similarly, even using a gaussian conditional  
 867 distribution (i.e. an ordinary linear mixed model) yields similar fixed effects results (Table  
 868 S5). These analyses showed that results remain similar regardless of the exact methodology  
 869 utilised.

870  
 871 **Table S1.** Fixed and random effects included in each candidate generalised linear mixed  
 872 model.

873

| Candidate Model | Random effects included |          |                      | Fixed effects included |          |                      |             |
|-----------------|-------------------------|----------|----------------------|------------------------|----------|----------------------|-------------|
|                 | Intercept               | DM offer | Expectancy Condition | Intercept              | DM offer | Expectancy Condition | Interaction |
| 1               | x                       |          |                      | x                      | x        | x                    |             |
| 2               | x                       |          |                      | x                      | x        | x                    | x           |
| 3               | x                       | x        |                      | x                      | x        | x                    |             |
| 4               | x                       | x        |                      | x                      | x        | x                    | x           |
| 5               | x                       | x        | x                    | x                      | x        | x                    |             |
| 6               | x                       | x        | x                    | x                      | x        | x                    | x           |

*Note.* DM = Decision-maker.



874 **Table S2.** Model comparison table of all candidate models across two studies (interleaved and blocked).

| Experiment | Candidate Model | Random effects included                     | Fixed effects (with 95% Confidence Interval) |                                     |                                  |                           | Model fit statistics     |             | Nagakawa R <sup>2</sup> |               |
|------------|-----------------|---------------------------------------------|----------------------------------------------|-------------------------------------|----------------------------------|---------------------------|--------------------------|-------------|-------------------------|---------------|
|            |                 |                                             | Intercept                                    | DM offer                            | RC type                          | Interaction               | AIC                      | AICw        | Condi-<br>tional        | Margi-<br>nal |
| 1          | 1               | Intercept                                   | 1.363*<br>[1.309, 1.418]                     | -0.025*<br>[-0.027, -0.023]         | 0.025*<br>[0.013, 0.037]         | NA                        | 10769.96                 | .000        | .335                    | .047          |
| 1          | 2               | Intercept                                   | 1.359*<br>[1.304, 1.415]                     | -0.024*<br>[-0.027, -0.022]         | 0.033*<br>[0.009, 0.058]         | -0.001<br>[-0.005, 0.002] | 10771.38                 | .000        | .335                    | .047          |
| 1          | 3               | Intercept and DM offer                      | 1.366*<br>[1.307, 1.425]                     | -0.026*<br>[-0.031, -0.021]         | 0.025*<br>[0.013, 0.037]         | NA                        | 10600.50                 | .033        | .355                    | .048          |
| 1          | 4               | Intercept and DM offer                      | 1.363*<br>[1.303, 1.422]                     | -0.025*<br>[-0.030, -0.020]         | 0.032*<br>[0.007, 0.056]         | -0.001<br>[-0.005, 0.003] | 10602.12                 | .015        | .355                    | .049          |
| <b>1</b>   | <b>5</b>        | <b>Intercept, DM offer,<br/>and RC type</b> | <b>1.367*<br/>[1.307, 1.427]</b>             | <b>-0.026*<br/>[-0.031, -0.021]</b> | <b>0.023*<br/>[0.005, 0.041]</b> | <b>NA</b>                 | <b>10593.80</b>          | <b>.951</b> | <b>.357</b>             | <b>.049</b>   |
| 1          | 6               | Intercept, DM offer,<br>and RC type         | 1.363*<br>[1.303, 1.424]                     | -0.025*<br>[-0.030, -0.020]         | 0.029*<br>[0.005, 0.055]         | -0.001<br>[-0.005, 0.003] | Convergence<br>Problems. |             | .355                    | .048          |
| 2          | 1               | Intercept                                   | 1.320*<br>[1.269, 1.371]                     | -0.029*<br>[-0.031, -0.027]         | 0.135*<br>[0.121, 0.148]         | NA                        | 13224.68                 | .000        | .303                    | .083          |
| 2          | 2               | Intercept                                   | 1.321*<br>[1.269, 1.373]                     | -0.029*<br>[-0.032, -0.026]         | 0.133*<br>[0.105, 0.160]         | -0.001<br>[-0.004, 0.005] | 13226.65                 | .000        | .303                    | .083          |
| 2          | 3               | Intercept and DM offer                      | 1.314*<br>[1.266, 1.361]                     | -0.028*<br>[-0.031, -0.024]         | 0.134*<br>[0.121, 0.147]         | NA                        | 13180.36                 | .000        | .304                    | .078          |
| 2          | 4               | Intercept and DM offer                      | 1.314*<br>[1.266, 1.363]                     | -0.028*<br>[-0.032, -0.024]         | 0.132*<br>[0.105, 0.160]         | -0.001<br>[-0.004, 0.005] | 13182.34                 | .004        | .304                    | .078          |
| <b>2</b>   | <b>5</b>        | <b>Intercept, DM offer,<br/>and RC type</b> | <b>1.312*<br/>[1.264, 1.359]</b>             | <b>-0.028*<br/>[-0.031, -0.024]</b> | <b>0.138*<br/>[0.110, 0.165]</b> | <b>NA</b>                 | <b>13079.58</b>          | <b>.999</b> | <b>.318</b>             | <b>.079</b>   |
| 2          | 6               | Intercept, DM offer,<br>and RC type         | 1.313*<br>[1.267, 1.359]                     | -0.028*<br>[-0.031, -0.025]         | 0.135*<br>[0.099, 0.172]         | -0.001<br>[-0.004, 0.005] | Convergence<br>Problems. |             | .312                    | .079          |

875 *Note.* AIC = Akaike Information Criterion. AICw = AIC weight. DM offer = Decision-maker offer. RC type = Receiver type (i.e.,  
 876 contextual-expectancy condition) dummy coded as 1 = Old Receiver (Context-expectant condition) and 0 = New Receiver (Context-  
 877 not-expectant condition). Interaction = interaction effect between DM offer and RC type. Significant predictors that do not cross zero  
 878 are marked with ‘\*’.

879 **Table S3.** Random effects structure, and confidence intervals thereof, for the best fitting  
 880 model, across two studies.

| Experiment | Random Effect        | Standard Deviation | Confidence Interval |       | Correlations |          |
|------------|----------------------|--------------------|---------------------|-------|--------------|----------|
|            |                      |                    | 2.5%                | 97.5% | Intercept    | DM offer |
| 1          | Intercept            | 0.221              | 0.182               | 0.27  |              |          |
| 1          | Decision-maker offer | 0.017              | 0.014               | 0.022 | -0.399       |          |
| 1          | Context-expectancy   | 0.047              | 0.031               | 0.071 | -0.273       | 0.089    |
| 2          | Intercept            | 0.172              | 0.14                | 0.211 |              |          |
| 2          | Decision-maker offer | 0.011              | 0.008               | 0.015 | 0.046        |          |
| 2          | Context-expectancy   | 0.093              | 0.073               | 0.119 | -0.099       | 0.096    |

881 *Note.* DM offer = Decision-maker offer.

882

883 **Table S4.** Fixed effects estimates and random effects structure for an alternative version of  
 884 the winning model based on gaussian distribution with a log link function.

| Experiment |                      | Fixed Effects |                     |        |          | Random Effects     |              |          |
|------------|----------------------|---------------|---------------------|--------|----------|--------------------|--------------|----------|
|            |                      | Estimate      | Confidence Interval |        | <i>p</i> | Standard Deviation | Correlations |          |
|            |                      |               | 2.5%                | 97.5%  |          |                    | Intercept    | DM offer |
| 1          | Intercept            | 0.296         | 1.251               | 1.341  | .001     | 0.166              |              |          |
| 1          | Decision-maker offer | -0.020        | -0.024              | -0.016 | .001     | 0.013              | -0.426       |          |
| 1          | Context-expectancy   | 0.021         | 0.005               | 0.037  | .008     | 0.043              | -0.567       | -0.090   |
| 2          | Intercept            | 0.249         | 1.213               | 1.285  | .001     | 0.132              |              |          |
| 2          | Decision-maker offer | -0.021        | -0.024              | -0.018 | .001     | 0.010              | 0.009        |          |
| 2          | Context-expectancy   | 0.111         | 0.088               | 0.135  | .001     | 0.077              | -0.597       | -0.188   |

885

886

887 **Table S5.** Fixed effects estimates and random effects structure for an alternative version of  
 888 the winning model based on gaussian distribution with an identity link function.

| Experiment |                      | Fixed Effects |                     |        |          | Random Effects     |              |          |
|------------|----------------------|---------------|---------------------|--------|----------|--------------------|--------------|----------|
|            |                      | Estimate      | Confidence Interval |        | <i>p</i> | Standard Deviation | Correlations |          |
|            |                      |               | 2.5%                | 97.5%  |          |                    | Intercept    | DM offer |
| 1          | Intercept            | 1.362         | 1.302               | 1.421  | .001     | 0.219              |              |          |
| 1          | Decision-maker offer | -0.025        | -0.03               | -0.02  | .001     | 0.017              | -0.574       |          |
| 1          | Context-expectancy   | 0.024         | 0.005               | 0.044  | .016     | 0.054              | -0.520       | -0.004   |
| 2          | Intercept            | 1.301         | 1.255               | 1.347  | .001     | 0.169              |              |          |
| 2          | Decision-maker offer | -0.026        | -0.029              | -0.022 | .001     | 0.011              | -0.249       |          |
| 2          | Context-expectancy   | 0.138         | 0.109               | 0.166  | .001     | 0.095              | -0.395       | -0.107   |

889  
 890  
 891  
 892  
 893

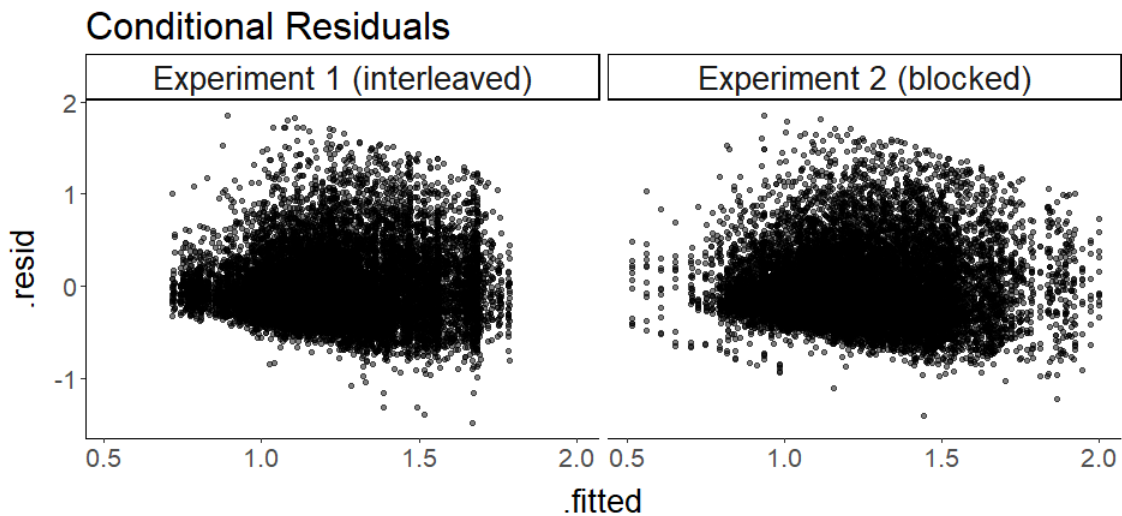

894 **Figure S1.** Diagnostic plot of model raw conditional residuals (y axis) by model predicted  
 895 value (x axis). Note that increasing residual raw variance (heteroscedasticity) is expected for  
 896 gamma models as the variance increases with the mean of the distribution.  
 897

898

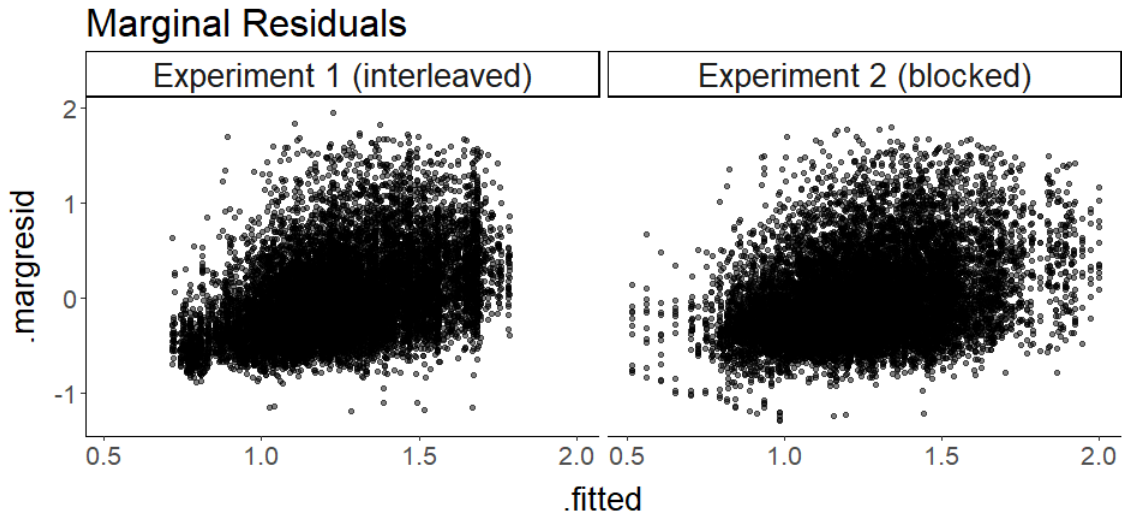

899  
 900 **Figure S2.** Diagnostic plot of model raw marginal residuals (y axis) by model predicted  
 901 value (x axis). Note that increasing residual raw variance (heteroscedasticity) is expected for  
 902 gamma models as the variance increases with the mean of the distribution.

903  
 904

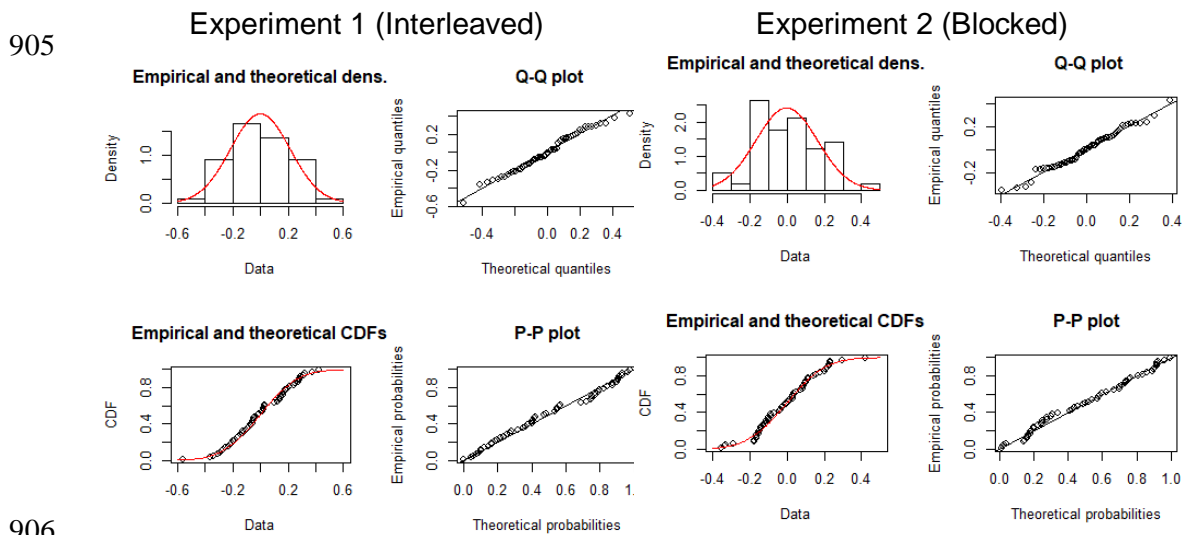

906  
 907 **Figure S3.** Diagnostic plots comparing the intercept random effect of the best-fitting RT  
 908 model to a normal distribution, showing that the model assumptions are upheld.

909

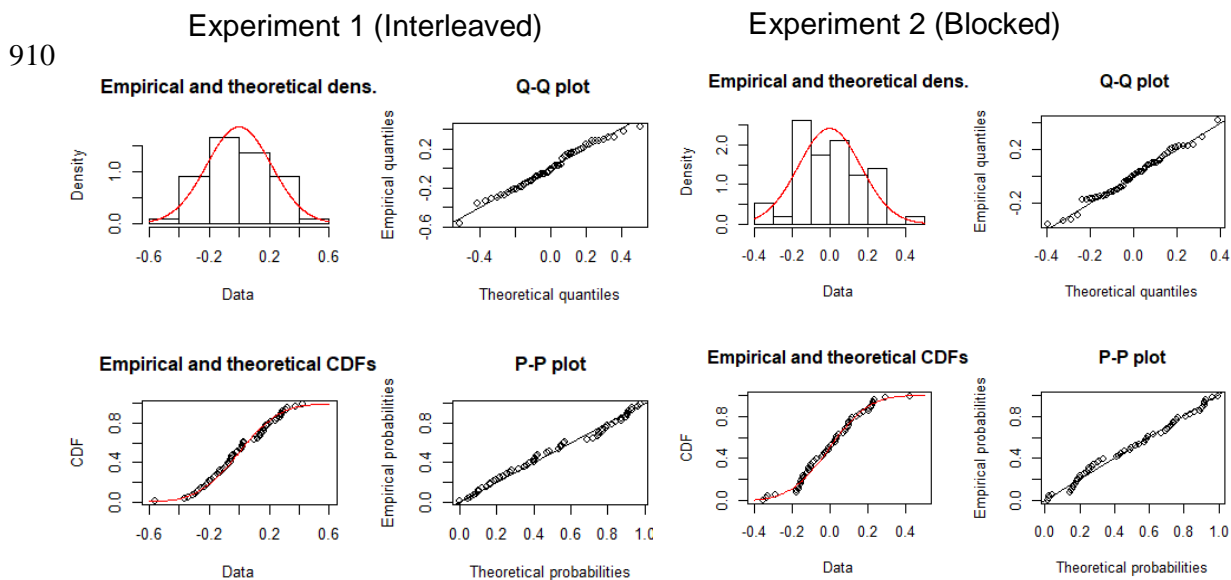

913 **Figure S4.** Diagnostic plots comparing the Decision-maker offer random effect of the best-  
 914 fitting RT model to a normal distribution, showing that the model assumptions are upheld.

915

916

917 **Model Simulations**

918 Figures S5-7 show how data simulated from our best-fitting model structure compare to the  
 919 observed data at various levels of aggregation – experiment, context-expectancy, condition,  
 920 and offer magnitude condition.

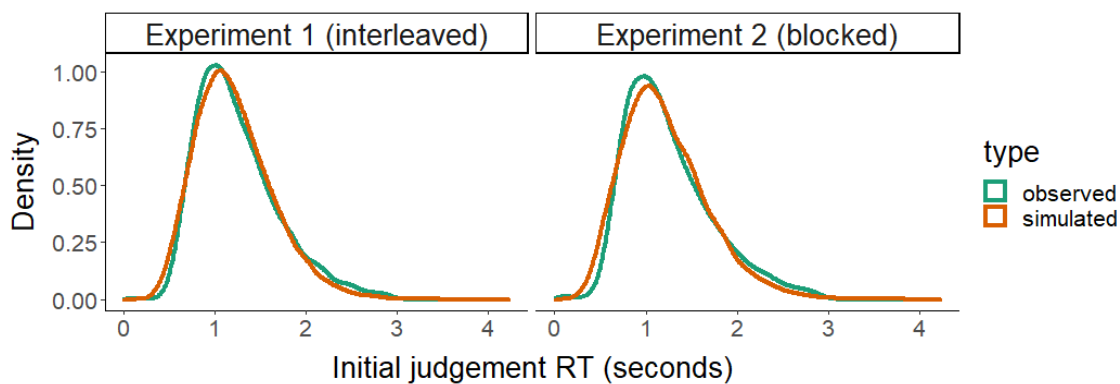

921

922 **Figure S5.** Comparison of observed RT data with data simulated from model structure at  
 923 aggregate level.

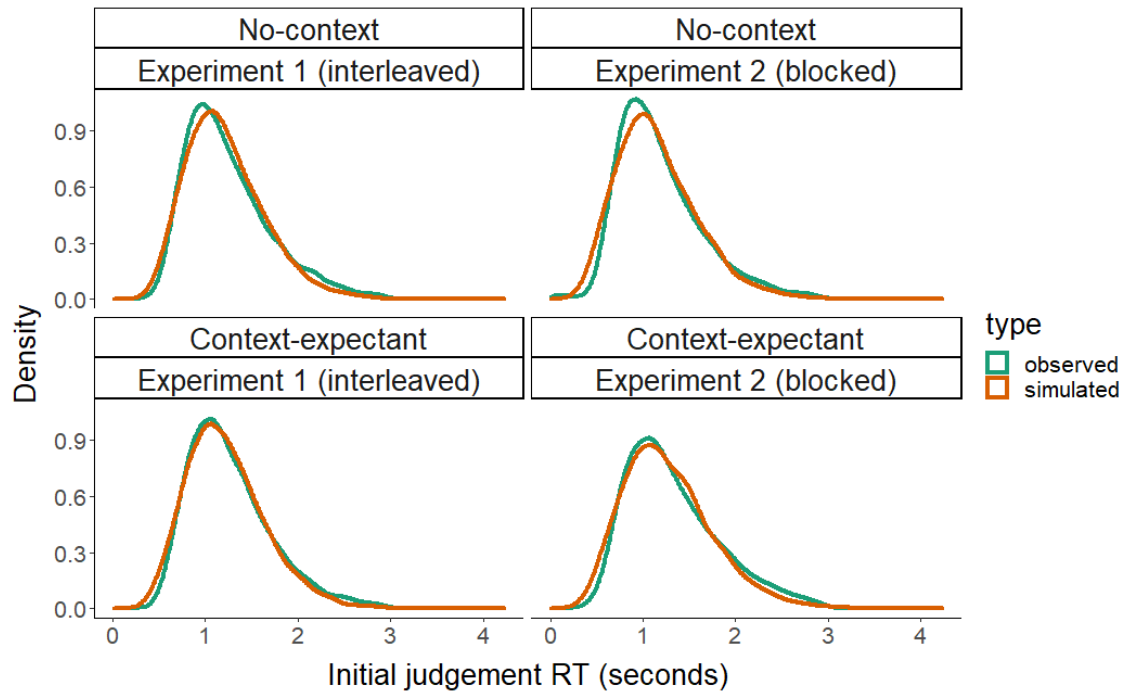

924

925 **Figure S6.** Comparison of observed RT data with data simulated from model structure,

926 faceted by contextual-information condition.

927

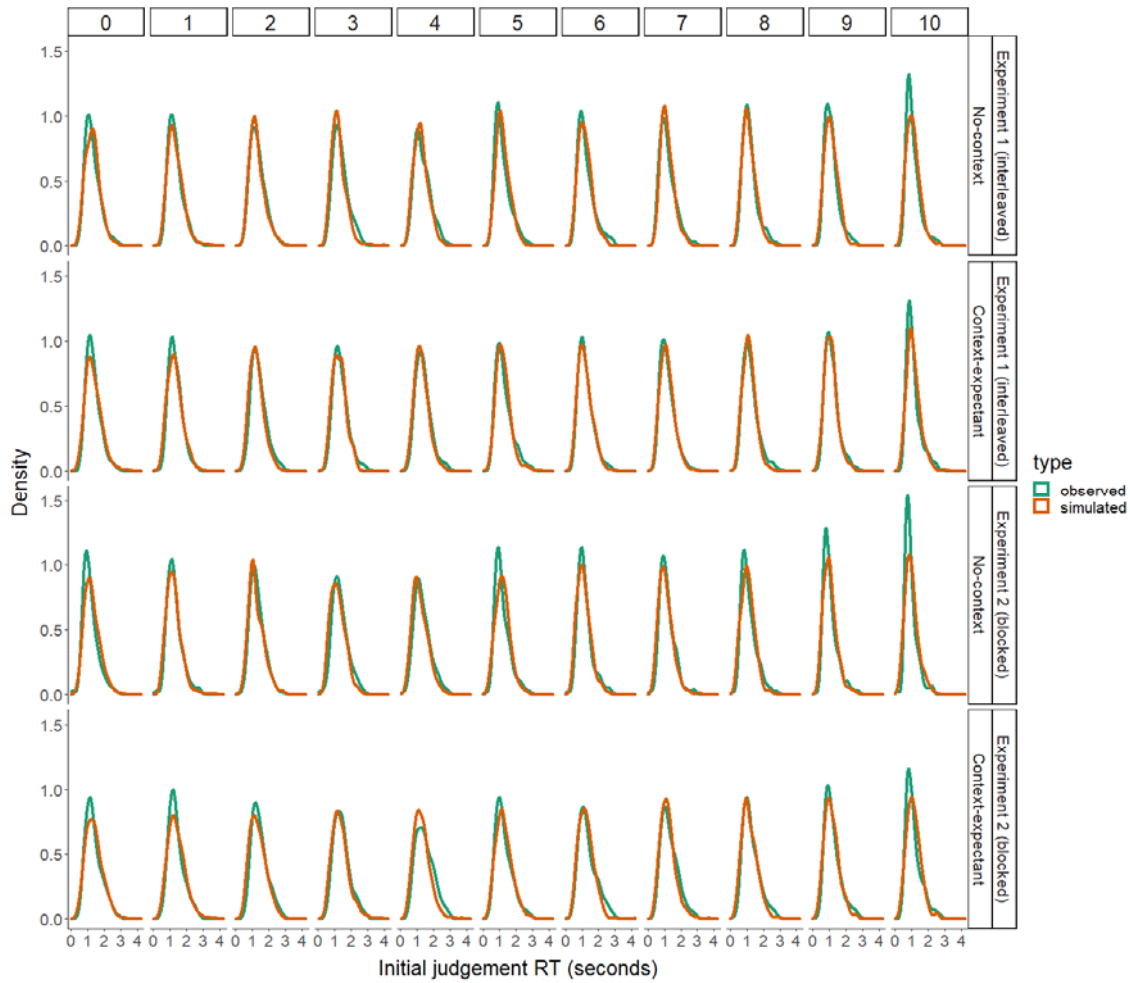

928

929 **Figure S7.** Comparison of observed RT data with data simulated from model structure,

930 faceted by contextual-information condition and Decision-maker offer.

931

932

## Supplement 2: Diffusion Decision Model

### 933 Model Simulations

934 Figures S8-10 show how data simulated from the two version of the fitted Diffusion Decision

935 Models (DDM) using the Posterior Probability Check procedure compare to empirical data.

936

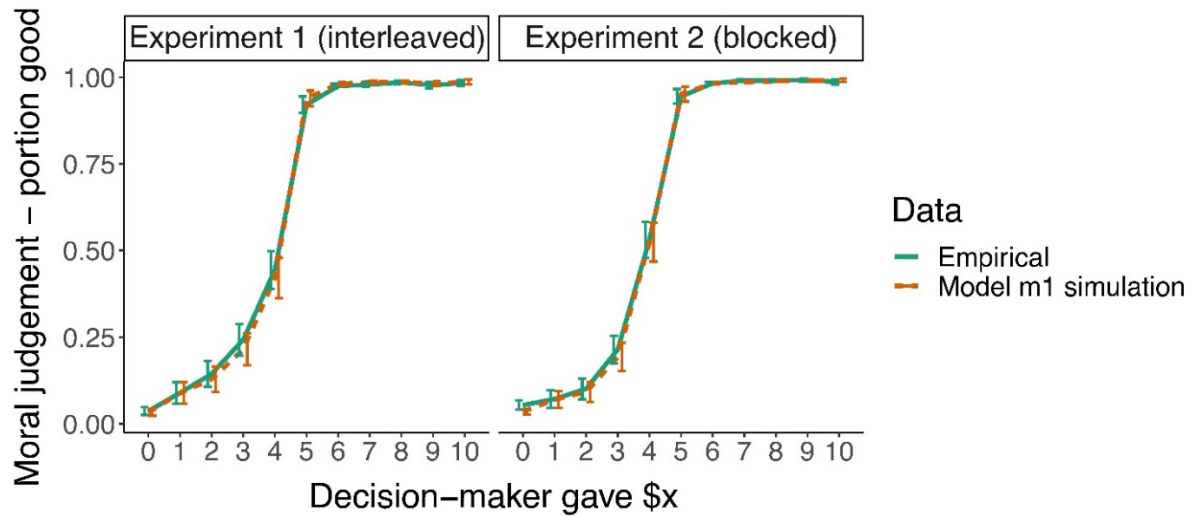

937

938 **Figure S8.** Comparison of empirical judgement data with data simulated by the PPC

939 procedure from the hypothesised Diffusion Decision Model. Error bars depict the SEM.



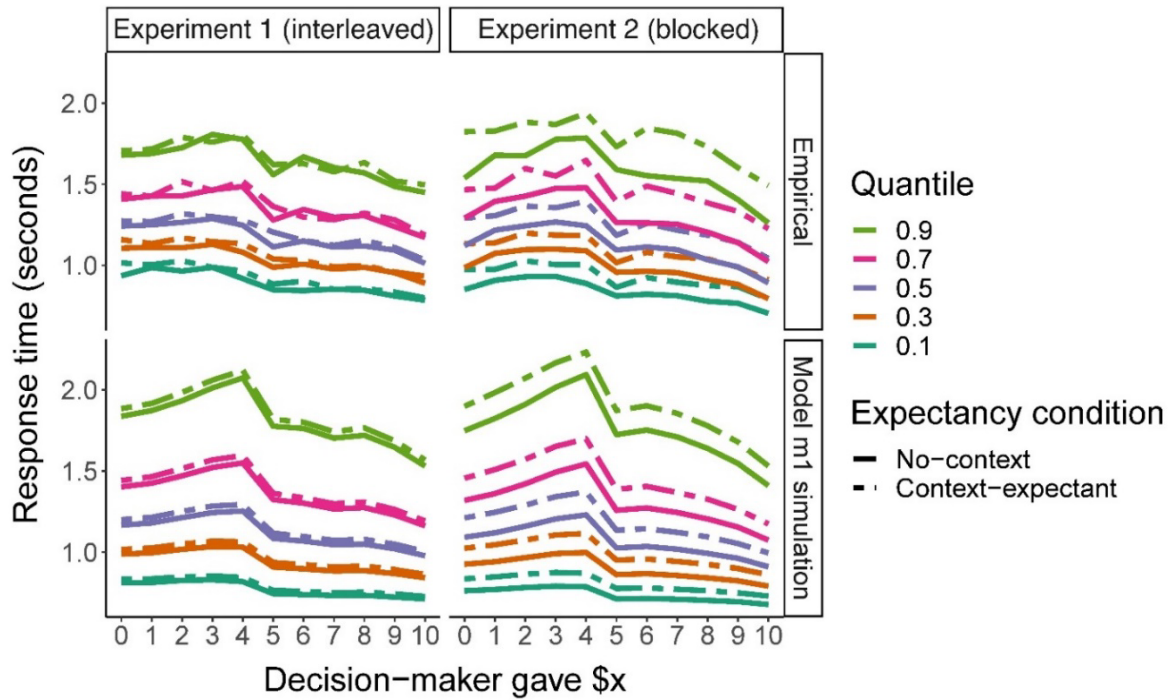

940  
 941 **Figure S9.** Comparison of empirical RT quantiles with data simulated by the PPC procedure  
 942 from the hypothesised Diffusion Decision Model.

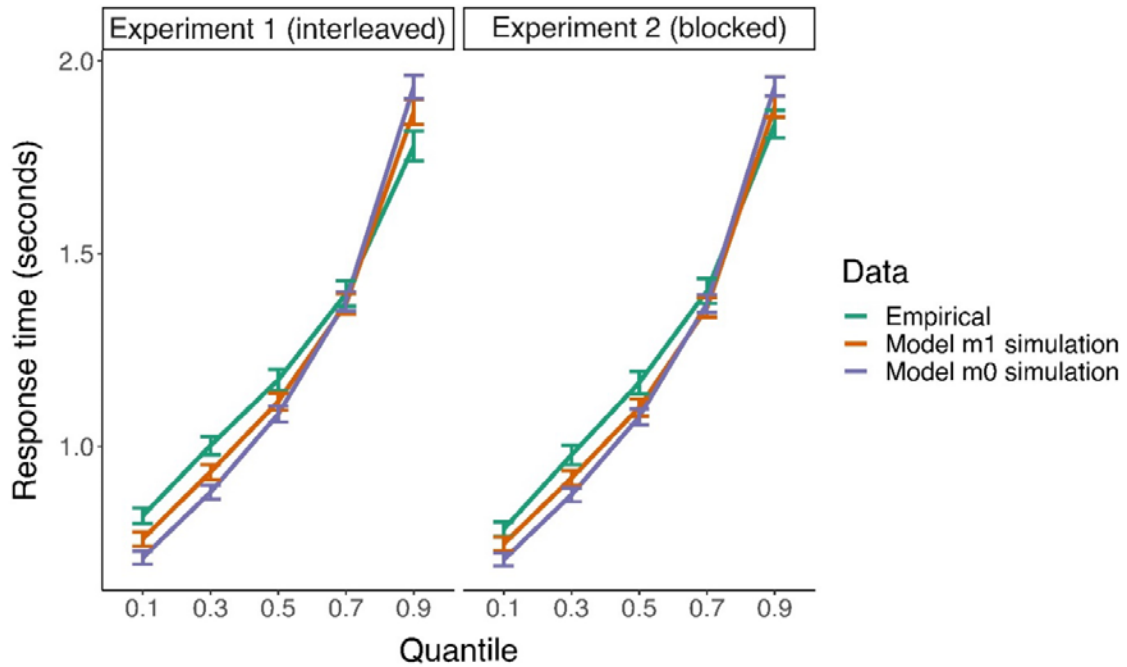

943  
 944 **Figure S10.** Comparison of the observed RT quantiles and RT quantiles from a dataset

945 simulated by the PPC procedure from two fitted Diffusion Decision Models. Error bars depict  
946 the SEM. The hypothesised m1 model approximates the quantile structure of RT better than  
947 the null m0 model.
